# Supplementary material for: Structural, magnetic and spectral properties of tetrahedral cobalt(ii) silanethiolates: a variety of structures and manifestation of field-induced slow magnetic relaxation
Source: Royal Society of Chemistry journal article supplement (doi:10.1039/c9dt03722e), 2019-12-18
Supplement: c9dt03722e1.pdf [file c9dt03722e1.pdf]

SUPPORTING INFORMATION

Structural, Magnetic and Spectral Properties of  
Tetrahedral Cobalt(II) Silanethiolates: Variety of Structures and Manifestation  
of Field-Induced Slow Magnetic Relaxation

*Daria Kowalkowska-Zedler,<sup>†</sup> Anna Dołęga,<sup>†</sup> Natalia Nedelko,<sup>‡</sup> Renata Łyszczek,<sup>§</sup> Pavlo Aleshkevych,<sup>‡</sup>  
Iraida Demchenko,<sup>£</sup> Justyna Łuczak,<sup>¥</sup> Anna Ślawska-Waniewska,<sup>‡\*</sup> and Agnieszka Pladzyk<sup>\*†</sup>*

*<sup>†</sup> Department of Inorganic Chemistry, Chemical Faculty, Gdańsk University of Technology,  
Narutowicza Str. 11/12, 80-233 Gdańsk, Poland*

*<sup>‡</sup> Institute of Physics, Polish Academy of Sciences, Aleja Lotników 32/46, 02-668 Warsaw, Poland*

*<sup>§</sup> Department of Coordination and General Chemistry, Maria Curie-Skłodowska University, M.C.  
Skłodowska Sq. 2, 20-031 Lublin, Poland*

*<sup>£</sup> Department of Chemistry, University of Warsaw, Pasteur Str 1, 02-093 Warsaw, Poland*

*<sup>¥</sup> Department of Chemical Technology, Chemical Faculty, Gdańsk University of Technology,  
Narutowicza Str. 11/12, 80-233 Gdańsk, Poland*

To whom correspondence should be addressed.

Email: [agnieszka.pladzyk@pg.edu.pl](mailto:agnieszka.pladzyk@pg.edu.pl)

[slaws@ifpan.edu.pl](mailto:slaws@ifpan.edu.pl)

*Supplementary Index*

**1.** Structural data

Table S1. Crystallographic data and structure refinement results for complexes **1-5**

Table S2. Selected interatomic distances (Å) for **1-5**.

Table S3. Selected bond angles (°) for complexes **1-5**

Table S4. Hydrogen bonds parameters for complexes **1-5**

Table S5. The values of torsion angles in **4** and **5**.

**2.** Spectral data

Table S6. UV-Vis reflectance spectra of **1-5**.

**3.** Magnetic data

Table S7. The parameters of Cole-Cole fitting of **2** and **4** under different dc magnetic fields at 2 K.

**4.** Supporting figures

## 1. STRUCTURAL DATA

**Table S1.** Crystallographic data and structure refinement results for complexes **1-5**

| Complexes                                       | <b>1</b>                                                                                                         | <b>2</b>                                                                                           | <b>3</b>                                                                                       | <b>4</b>                                                                                                       | <b>5</b>                                                                                       |
|-------------------------------------------------|------------------------------------------------------------------------------------------------------------------|----------------------------------------------------------------------------------------------------|------------------------------------------------------------------------------------------------|----------------------------------------------------------------------------------------------------------------|------------------------------------------------------------------------------------------------|
| Empirical formula                               | C <sub>103</sub> H <sub>206</sub> N <sub>12</sub> Co <sub>3</sub> O <sub>21</sub> S <sub>6</sub> Si <sub>6</sub> | C <sub>35.5</sub> H <sub>66</sub> N <sub>4</sub> CoO <sub>7.5</sub> S <sub>2</sub> Si <sub>2</sub> | C <sub>36</sub> H <sub>74</sub> N <sub>4</sub> CoO <sub>8</sub> S <sub>2</sub> Si <sub>2</sub> | C <sub>60</sub> H <sub>124</sub> N <sub>4</sub> Co <sub>2</sub> O <sub>12</sub> S <sub>4</sub> Si <sub>4</sub> | C <sub>30</sub> H <sub>62</sub> N <sub>2</sub> CoO <sub>6</sub> S <sub>2</sub> Si <sub>2</sub> |
| $M_r$ /g mol <sup>-1</sup>                      | 2486.48                                                                                                          | 848.15                                                                                             | 870.22                                                                                         | 1452.08                                                                                                        | 726.04                                                                                         |
| $T$ (K)                                         | 120                                                                                                              | 120                                                                                                | 120                                                                                            | 120                                                                                                            | 120                                                                                            |
| Wavelength /Å                                   | 0.71073 (Mo K $\alpha$ )                                                                                         | 0.71073 (Mo K $\alpha$ )                                                                           | 0.71073 (Mo K $\alpha$ )                                                                       | 0.71073 (Mo K $\alpha$ )                                                                                       | 0.71073 (Mo K $\alpha$ )                                                                       |
| Crystal system                                  | triclinic                                                                                                        | triclinic                                                                                          | triclinic                                                                                      | triclinic                                                                                                      | orthorhombic                                                                                   |
| Space group                                     | <i>P</i> -1                                                                                                      | <i>P</i> -1                                                                                        | <i>P</i> -1                                                                                    | <i>P</i> -1                                                                                                    | <i>Pca</i> 2 <sub>1</sub>                                                                      |
| $a$ (Å)                                         | 15.779(6)                                                                                                        | 9.556(9)                                                                                           | 9.825(3)                                                                                       | 9.182(5)                                                                                                       | 27.991(3)                                                                                      |
| $b$ (Å)                                         | 21.493(5)                                                                                                        | 13.484(13)                                                                                         | 15.238(4)                                                                                      | 14.081(13)                                                                                                     | 9.623(3)                                                                                       |
| $c$ (Å)                                         | 22.043(6)                                                                                                        | 20.611(14)                                                                                         | 18.819(5)                                                                                      | 16.395(7)                                                                                                      | 16.419(3)                                                                                      |
| $\alpha$ (°)                                    | 70.174(19)                                                                                                       | 99.29(5)                                                                                           | 108.65(2)                                                                                      | 104.97(5)                                                                                                      | 90                                                                                             |
| $\beta$ (°)                                     | 79.49(3)                                                                                                         | 101.10(6)                                                                                          | 96.17(2)                                                                                       | 94.60(4)                                                                                                       | 90                                                                                             |
| $\gamma$ (°)                                    | 82.11(3)                                                                                                         | 108.21(6)                                                                                          | 108.46(2)                                                                                      | 99.97(6)                                                                                                       | 90                                                                                             |
| $V$ (Å <sup>3</sup> )                           | 6891(4)                                                                                                          | 2405(3)                                                                                            | 2462.9(12)                                                                                     | 1999(2)                                                                                                        | 4422.6(17)                                                                                     |
| $Z$                                             | 2                                                                                                                | 2                                                                                                  | 2                                                                                              | 1                                                                                                              | 4                                                                                              |
| Crystal size (mm)                               | 0.253×0.243×0.233                                                                                                | 0.068×0.171×0.345                                                                                  | 0.28×0.255×0.239                                                                               | 0.345×0.171×0.068                                                                                              | 0.265×0.149×0.071                                                                              |
| $D_{\text{calc}}$ (Mg m <sup>-3</sup> )         | 1.198                                                                                                            | 1.171                                                                                              | 1.173                                                                                          | 1.206                                                                                                          | 1.090                                                                                          |
| $\theta$ range (°)                              | 1.943 to 25.999                                                                                                  | 2.452 to 25.997                                                                                    | 2.86 to 28.86                                                                                  | 2.47 to 25.999                                                                                                 | 2.116 to 25.999                                                                                |
| Reflections collected/unique                    | 53380 / 26627                                                                                                    | 18030 / 9265                                                                                       | 33508 / 9265                                                                                   | 14827 / 7741                                                                                                   | 30977/8288                                                                                     |
| $R_{\text{int}}$                                | 0.0469                                                                                                           | 0.0453                                                                                             | 0.0372                                                                                         | 0.0453                                                                                                         | 0.1237                                                                                         |
| $\mu$ (mm <sup>-1</sup> )                       | 0.561                                                                                                            | 0.538                                                                                              | 0.527                                                                                          | 0.631                                                                                                          | 0.571                                                                                          |
| Data / restraints / parameters                  | 26627 / 5 / 1431                                                                                                 | 9265 / 6 / 503                                                                                     | 9265 / 0 / 522                                                                                 | 7741 / 0 / 414                                                                                                 | 8288 / 1 / 324                                                                                 |
| GOF on $F^2$                                    | 0.85                                                                                                             | 1.054                                                                                              | 1.038                                                                                          | 1.043                                                                                                          | 1.037                                                                                          |
| Final $R$ indices                               |                                                                                                                  |                                                                                                    |                                                                                                |                                                                                                                |                                                                                                |
| $R_1, wR_2$ [ $I > 2\sigma(I)$ ]                | 0.0449, 0.0949                                                                                                   | 0.0422, 0.1035                                                                                     | 0.0361, 0.0899                                                                                 | 0.0422, 0.1035                                                                                                 | 0.0942, 0.2155                                                                                 |
| $R_1, wR_2$ (all data)                          | 0.0827, 0.1048                                                                                                   | 0.0588, 0.1117                                                                                     | 0.0511, 0.0955                                                                                 | 0.0588, 0.1117                                                                                                 | 0.1339, 0.2413                                                                                 |
| Largest diff. peak and hole (eÅ <sup>-3</sup> ) | 1.036 and -0.448                                                                                                 | 0.897 and -0.347                                                                                   | 0.511 and -0.291                                                                               | 0.897 and -0.347                                                                                               | 0.983 and -0.481                                                                               |
| CCDC number                                     | 1894270                                                                                                          | 1894273                                                                                            | 1894274                                                                                        | 1894275                                                                                                        | 1894276                                                                                        |

**Table S2.** Selected bond distances (Å) for complexes **1-5**

|                 | <b>1</b>   | <b>2</b>   | <b>3</b>   | <b>4</b>              | <b>5</b>               |
|-----------------|------------|------------|------------|-----------------------|------------------------|
| Bond length [Å] |            |            |            |                       |                        |
| Co(1)-N(1)      | 2.073(3)   | 2.066(3)   | 2.0208(16) | 2.041(2)              | 2.048(8) <sup>ii</sup> |
| Co(1)-N(2)      |            |            |            | 2.060(2) <sup>i</sup> |                        |
| Co(1)-N(3)      | 2.041(2)   | 2.041(4)   | 2.0057(15) |                       |                        |
| Co(2)-N(5)      | 2.061(3)   |            |            |                       | 2.029(8)               |
| Co(2)-N(7)      | 2.048(2)   |            |            |                       |                        |
| Co(3)-N(9)      | 2.038(2)   |            |            |                       |                        |
| Co(3)-N(11)     | 2.057(3)   |            |            |                       |                        |
| Co(1)-S(1)      | 2.3024(11) | 2.294(3)   | 2.3101(10) | 2.2773(16)            | 2.291(2)               |
| Co(1)-S(2)      | 2.2759(10) | 2.2956(18) | 3.3127(7)  | 2.270(2)              | 2.310(3)               |
| Co(2)-S(3)      | 2.2922(10) |            |            |                       |                        |
| Co(2)-S(4)      | 2.3044(10) |            |            |                       |                        |
| Co(3)-S(5)      | 2.2909(9)  |            |            |                       |                        |
| Co(3)-S(6)      | 2.3126(10) |            |            |                       |                        |
| Si(1)-S(1)      | 2.0999(13) | 2.0883(18) | 2.0843(8)  | 2.070(2)              | 2.068(3)               |
| Si(2)-S(2)      | 2.0929(13) | 2.079(3)   | 2.0888(9)  | 2.0827(16)            | 2.073(3)               |
| Si(3)-S(3)      | 2.0923(12) |            |            |                       |                        |
| Si(4)-S(4)      | 2.1007(13) |            |            |                       |                        |
| Si(5)-S(5)      | 2.0979(12) |            |            |                       |                        |
| Si(6)-S(6)      | 2.0989(13) |            |            |                       |                        |
| Si(1)-O(1)      | 1.624(2)   | 1.629(4)   | 1.6324(13) | 1.631(2)              | 1.634(8)               |
| Si(1)-O(2)      | 1.616(2)   | 1.619(3)   | 1.6244(13) | 1.626(2)              | 1.597(9)               |
| Si(1)-O(3)      | 1.6283(18) | 1.628(4)   | 1.6321(14) | 1.6507(19)            | 1.620(6)               |
| Si(2)-O(4)      | 1.625(2)   | 1.625(3)   | 1.6219(14) | 1.627(2)              | 1.648(7)               |
| Si(2)-O(5)      | 1.627(2)   | 1.621(3)   | 1.6306(15) | 1.633(2)              | 1.625(9)               |
| Si(2)-O(6)      | 1.638(2)   | 1.625(3)   | 1.6286(13) | 1.647(2)              | 1.622(9)               |
| Si(3)-O(7)      | 1.631(2)   |            |            |                       |                        |
| Si(3)-O(8)      | 1.6248(19) |            |            |                       |                        |
| Si(3)-O(9)      | 1.626(2)   |            |            |                       |                        |
| Si(4)-O(10)     | 1.6186(19) |            |            |                       |                        |
| Si(4)-O(11)     | 1.625(2)   |            |            |                       |                        |
| Si(4)-O(12)     | 1.6290(18) |            |            |                       |                        |
| Si(5)-O(13)     | 1.6230(19) |            |            |                       |                        |
| Si(5)-O(14)     | 1.625(2)   |            |            |                       |                        |
| Si(5)-O(15)     | 1.628(2)   |            |            |                       |                        |
| Si(6)-O(16)     | 1.6187(19) |            |            |                       |                        |
| Si(6)-O(17)     | 1.6330(18) |            |            |                       |                        |
| Si(6)-O(18)     | 1.631(2)   |            |            |                       |                        |

Symmetry code(s): (i)  $-x+1, -y+1, -z+1$ ; (ii)  $-x+1, -y+1, z-1/2$ ;**Table S3.** Selected bond angles (°) for complexes **1-5**

| Bond angles [deg] | <b>1</b>   | <b>2</b>   | <b>3</b>  | <b>4</b>               | <b>5</b>               |
|-------------------|------------|------------|-----------|------------------------|------------------------|
| N(1)-Co(1)-N(2)   |            |            |           | 106.57(9) <sup>i</sup> |                        |
| N(1)-Co(1)-N(3)   | 104.87(11) | 108.06(14) | 115.10(6) |                        |                        |
| N(1)-Co(1)-N(5)   |            |            |           |                        | 110.7(3) <sup>ii</sup> |
| N(5)-Co(2)-N(7)   | 111.55(10) |            |           |                        |                        |
| N(9)-Co(3)-N(11)  | 106.04(10) |            |           |                        |                        |
| N(1)-Co(1)-S(1)   | 107.05(8)  | 95.93(12)  | 109.52(5) | 110.15(8)              | 113.3(2) <sup>ii</sup> |
| N(2)-Co(1)-S(1)   |            |            |           | 109.09(8) <sup>i</sup> |                        |

|                  |           |            |           |                        |                       |
|------------------|-----------|------------|-----------|------------------------|-----------------------|
| N(3)-Co(1)-S(1)  | 111.22(8) | 111.84(12) | 111.61(5) |                        |                       |
| N(5)-Co(1)-S(1)  |           |            |           | 108.5(2)               |                       |
| N(1)-Co(1)-S(2)  | 112.59(7) | 113.38(11) | 108.27(5) | 105.10(8)              | 101.7(2) <sup>i</sup> |
| N(2)-Co(1)-S(2)  |           |            |           | 107.16(9) <sup>i</sup> |                       |
| N(3)-Co(1)-S(2)  | 110.42(8) | 113.04(12) | 111.41(5) |                        |                       |
| N(5)-Co(1)-S(2)  |           |            |           |                        | 112.7(2)              |
| N(5)-Co(2)-S(3)  | 112.17(7) |            |           |                        |                       |
| N(7)-Co(2)-S(3)  | 109.68(7) |            |           |                        |                       |
| N(5)-Co(2)-S(4)  | 99.83(7)  |            |           |                        |                       |
| N(7)-Co(2)-S(4)  | 110.19(7) |            |           |                        |                       |
| N(9)-Co(3)-S(5)  | 111.67(8) |            |           |                        |                       |
| N(11)-Co(3)-S(5) | 113.91(7) |            |           |                        |                       |
| N(9)-Co(3)-S(6)  | 111.19(8) |            |           |                        |                       |
| N(11)-Co(3)-S(6) | 103.31(8) |            |           |                        |                       |
| S(1)-Co(1)-S(2)  | 110.54(4) | 113.31(8)  | 99.82(3)  | 118.14(6)              | 109.80(9)             |
| S(3)-Co(2)-S(4)  | 113.14(4) |            |           |                        |                       |
| S(5)-Co(3)-S(6)  | 110.37(4) |            |           |                        |                       |
| Si(1)-S(1)-Co(1) | 107.41(5) | 107.45(8)  | 110.15(3) | 109.60(6)              | 106.81(12)            |
| Si(2)-S(2)-Co(1) | 114.06(5) | 105.84(8)  | 112.95(3) | 109.63(7)              | 105.48(13)            |
| Si(3)-S(3)-Co(2) | 104.58(4) |            |           |                        |                       |
| Si(4)-S(4)-Co(2) | 107.89(4) |            |           |                        |                       |
| Si(5)-S(5)-Co(3) | 105.77(4) |            |           |                        |                       |
| Si(6)-S(6)-Co(3) | 106.43(4) |            |           |                        |                       |

Symmetry code(s): (i)  $-x+1, -y+1, -z+1$ ; (ii)  $-x+1, -y+1, z-1/2$ ;

**Table S4.** Hydrogen bonds parameters for complexes **1-5**

|          | D—H...A                     | D—H [Å]  | H...A [Å] | D...A [Å]  | ∠ DHA [°] |
|----------|-----------------------------|----------|-----------|------------|-----------|
| <b>1</b> | N8—H8E...O19                | 0.86     | 2.2       | 3.013(3)   | 158.3     |
|          | N12—H12D...O19              | 0.86     | 2.8       | 3.473(4)   | 135.7     |
|          | N12—H12E...O21              | 0.86     | 2.21      | 3.056(4)   | 164.6     |
|          | O20—H20G...S4               | 0.85     | 2.68      | 3.505(3)   | 163.6     |
|          | O19—H19G...S6               | 0.896(5) | 2.599(5)  | 3.331(2)   | 139.4(8)  |
|          | O19—H19H...S5               | 0.895(5) | 2.597(5)  | 3.315(2)   | 137.8(8)  |
| <b>2</b> | N2—H2B...S1 <sup>i</sup>    | 0.86     | 2.64      | 3.498(5)   | 171.4     |
|          | N4—H4D...S1 <sup>ii</sup>   | 0.87     | 2.97      | 3.714(5)   | 144.2     |
|          | N4—H4E...O8B                | 0.87     | 2.44      | 3.182(13)  | 143.4     |
| <b>3</b> | O7—H7...S2                  | 0.74(3)  | 2.59(3)   | 3.300(2)   | 161(3)    |
|          | O8—H8...O7                  | 0.71(2)  | 2.09(2)   | 2.797(2)   | 170(3)    |
|          | N2—H2A...S1 <sup>i</sup>    | 0.91(2)  | 2.56(2)   | 3.4023(19) | 153.7(18) |
|          | N2—H2B...S2 <sup>i</sup>    | 0.77(2)  | 2.74(2)   | 3.374(2)   | 142(2)    |
|          | N4—H4A...O7 <sup>ii</sup>   | 0.82(3)  | 2.44(3)   | 3.091(3)   | 137(2)    |
|          | N4—H4B...O8 <sup>iii</sup>  | 0.83(3)  | 2.16(3)   | 2.944(3)   | 159(2)    |
| <b>4</b> | N2—H2E...O3 <sup>iiii</sup> | 0.85(3)  | 2.17(3)   | 2.978(4)   | 158(3)    |
|          | N2—H2D...O6 <sup>iiii</sup> | 0.80(3)  | 2.18(3)   | 2.936(4)   | 157(3)    |
| <b>5</b> | N1—H1A...O5 <sup>iiii</sup> | 0.89     | 2.26      | 3.016(10)  | 143.2     |

Symmetry code(s): (i)  $-x+2, -y+1, -z+1$ ; (ii)  $x-1, y, z$ ; (iii)  $-x+2, -y+2, -z+2$ ; (iiii)  $-x+1, -y+1, -z+1$ ; (iiiii)  $-x+1, -y+1, z+1/2$ ;

**Table S5.** The values of torsion angles in **4** and **5**.

| compound 4           |              | compound 5           |              |
|----------------------|--------------|----------------------|--------------|
| angle                | [°]          | angle                | [°]          |
| <b>S1-Co1-S2-Si2</b> | <b>-82</b>   | S1-Co1-S2-Si2        | <b>177.8</b> |
| <b>S2-Co1-S1-Si1</b> | <b>164.1</b> | S2-Co1-S1-Si1        | <b>152.7</b> |
| N2-Co1-N1-C29        | -76.5        | N1-Co1-N5-C25        | -70          |
| N2-Co1-N1-C25        | 99.5         | N1-Co1-N5-C29        | 113          |
| <b>N1-Co1-N2-C30</b> | <b>-21.1</b> | <b>N5-Co1-N1-C30</b> | <b>168.6</b> |
| <b>N1-Co1-N2-H2E</b> | <b>100</b>   | <b>N5-Co1-N1-H1A</b> | <b>-70.6</b> |
| <b>N1-Co1-N2-H2D</b> | <b>-145</b>  | <b>N5-Co1-N1-H1B</b> | <b>47.54</b> |

## 2. SPECTRAL DATA

**Table S6.** UV-Vis reflectance spectra of **1-5**.

|          | UV<br>$\lambda_{\max}$ [nm] | Vis<br>$\lambda_{\max}$ [nm] |
|----------|-----------------------------|------------------------------|
| <b>1</b> | 233; 302; 364sh             | 600; 643; 673                |
| <b>2</b> | 242; 311; 361sh             | 606; 640; 664                |
| <b>3</b> | 270; 325sh                  | 588; 618; 669                |
| <b>4</b> | 260; 292; 336(362sh)        | 590; 634; 676                |
| <b>5</b> | 255; 295; 336sh             | 604; 654; 679                |

## 3. MAGNETIC DATA

**Table S7.** The parameters of Cole-Cole fitting of **2** and **4** under different *dc* magnetic fields at 2 K. Cole-Cole plots were fitted using the formulas describing  $\chi'$  and  $\chi''$  as a function of frequency:<sup>[1]</sup>

$$\chi'(\omega) = \chi_S + \frac{\chi_{TS} (1 + (\omega\tau)^{1-\alpha} \sin(\pi\alpha/2))}{1 + 2(\omega\tau)^{1-\alpha} \sin(\pi\alpha/2) + (\omega\tau)^{2(1-\alpha)}} \quad \text{and} \quad \chi''(\omega) = \frac{\chi_{TS} (\omega\tau)^{1-\alpha} \cos(\pi\alpha/2)}{1 + 2(\omega\tau)^{1-\alpha} \sin(\pi\alpha/2) + (\omega\tau)^{2(1-\alpha)}}$$

where,  $\omega = 2\pi\nu$  and  $\chi_{TS} = \chi_T - \chi_S$ , ( $\chi_T$  and  $\chi_S$  are the isothermal and adiabatic susceptibilities, respectively),  $\tau$  – relaxation time and  $\alpha$  – a variable representing the distribution of relaxation times.

[1] K. S. Cole, R. H. Cole, *J. Chem. Phys.*, 1941, **9**, 341.

| 2          |        |             |             |          | 4          |        |             |             |          |
|------------|--------|-------------|-------------|----------|------------|--------|-------------|-------------|----------|
| <i>H</i>   | $\tau$ | $\chi_{TS}$ | $\chi_{SC}$ | $\alpha$ | <i>H</i>   | $\tau$ | $\chi_{TS}$ | $\chi_{SC}$ | $\alpha$ |
| kOe        | ms     |             |             |          | kOe        | ms     |             |             |          |
| <b>0.1</b> | 0.030  | 0.278       | 0.490       | 0.047    | <b>0.1</b> | 0.025  | 0.253       | 0.238       | 0.180    |
| <b>0.4</b> | 0.064  | 0.594       | 0.170       | 0.068    | <b>0.4</b> | 0.054  | 0.368       | 0.128       | 0.144    |
| <b>0.7</b> | 0.070  | 0.630       | 0.115       | 0.076    | <b>0.7</b> | 0.066  | 0.324       | 0.173       | 0.165    |

|            |       |       |       |       |            |       |       |       |       |
|------------|-------|-------|-------|-------|------------|-------|-------|-------|-------|
| <b>1</b>   | 0.070 | 0.619 | 0.095 | 0.084 | <b>1</b>   | 0.085 | 0.368 | 0.124 | 0.114 |
| <b>1.5</b> | 0.065 | 0.571 | 0.082 | 0.099 | <b>1.5</b> | 0.086 | 0.389 | 0.100 | 0.117 |
| <b>2</b>   | 0.059 | 0.510 | 0.075 | 0.119 | <b>2</b>   | 0.093 | 0.381 | 0.100 | 0.135 |
| <b>3</b>   | 0.044 | 0.393 | 0.063 | 0.161 | <b>3</b>   | 0.099 | 0.306 | 0.164 | 0.187 |
| <b>4</b>   | 0.032 | 0.294 | 0.061 | 0.192 | <b>4</b>   | 0.091 | 0.189 | 0.255 | 0.238 |
| <b>6</b>   | 0.014 | 0.191 | 0.045 | 0.292 | <b>6</b>   | 0.190 | 0.198 | 0.188 | 0.215 |
|            |       |       |       |       | <b>8</b>   | 0.207 | 0.178 | 0.127 | 0.175 |
|            |       |       |       |       | <b>10</b>  | 0.124 | 0.129 | 0.099 | 0.137 |
|            |       |       |       |       | <b>15</b>  | 0.027 | 0.051 | 0.074 | 0.177 |

#### **4. SUPPORTING FIGURES**

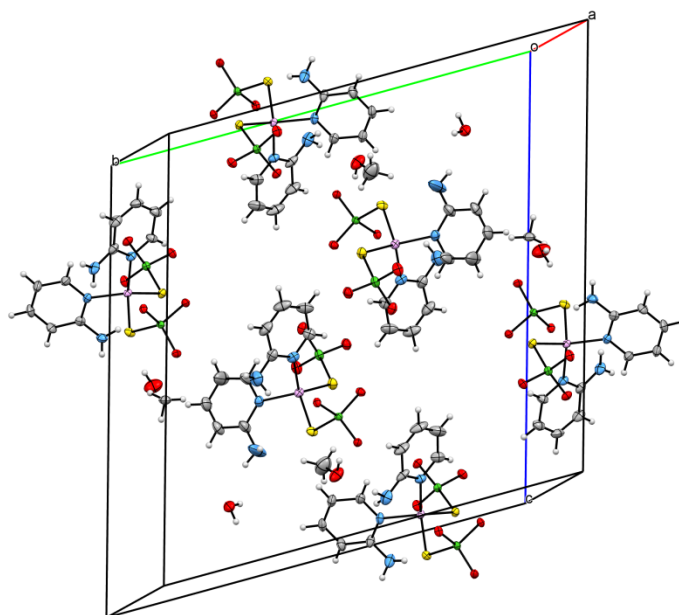

**Fig. S1** The crystal packing of **1** along *b* axis. H atoms and *t*Bu groups omitted for clarity (S-yellow, O-red, N-blue, Si-green, Co-pink, C – grey, H-white).

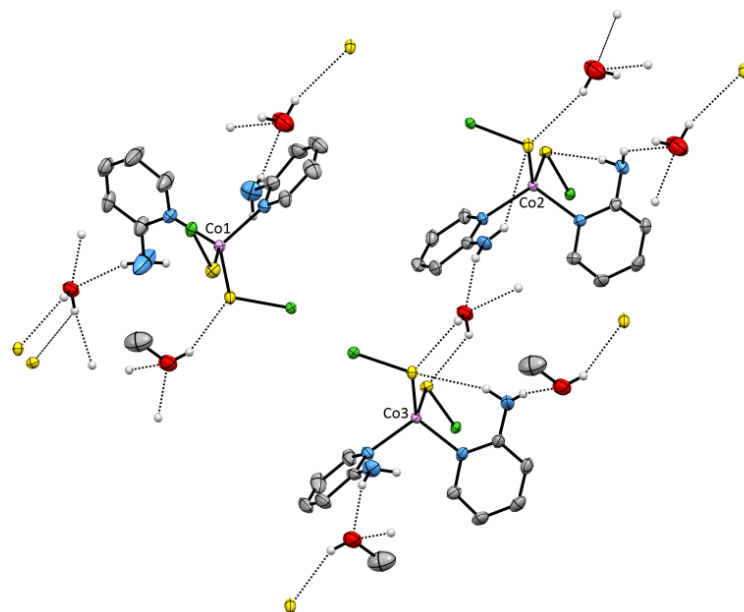

**Fig. S2** The net of hydrogen bonding interactions between molecules of compound **1** (S-yellow, O-red, N-blue, Si-green, Co-pink, C – grey, H-white).

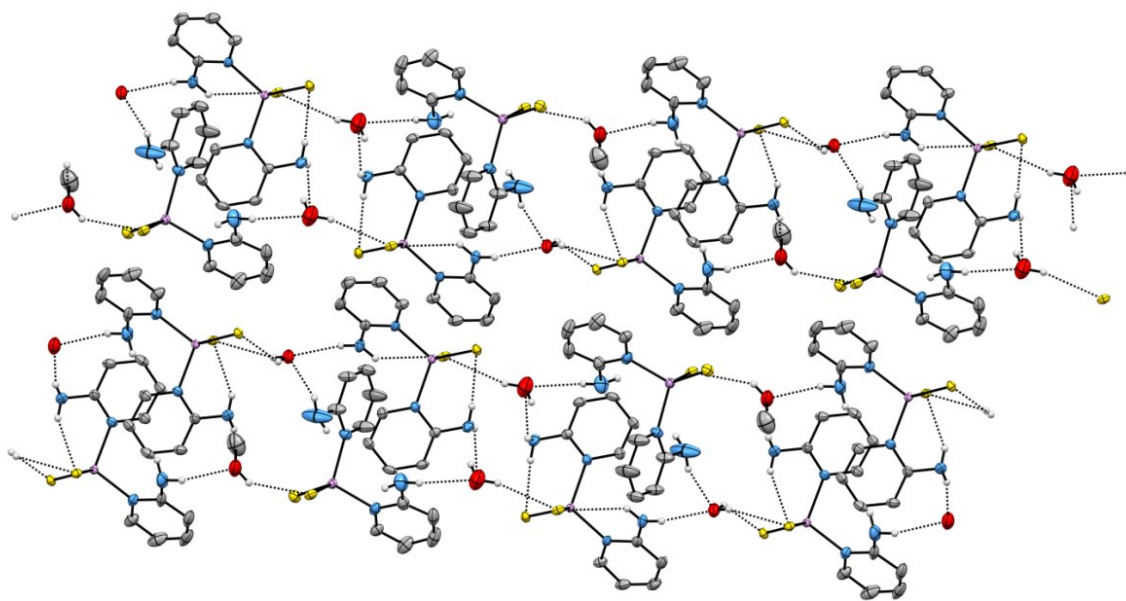

**Fig. S3** The crystal packing of **1** along *b* axis with hydrogen bonding interactions shown as dashed lines. H atoms and *t*Bu groups omitted for clarity (S-yellow, O-red, N-blue, Si-green, Co-pink, C-grey).

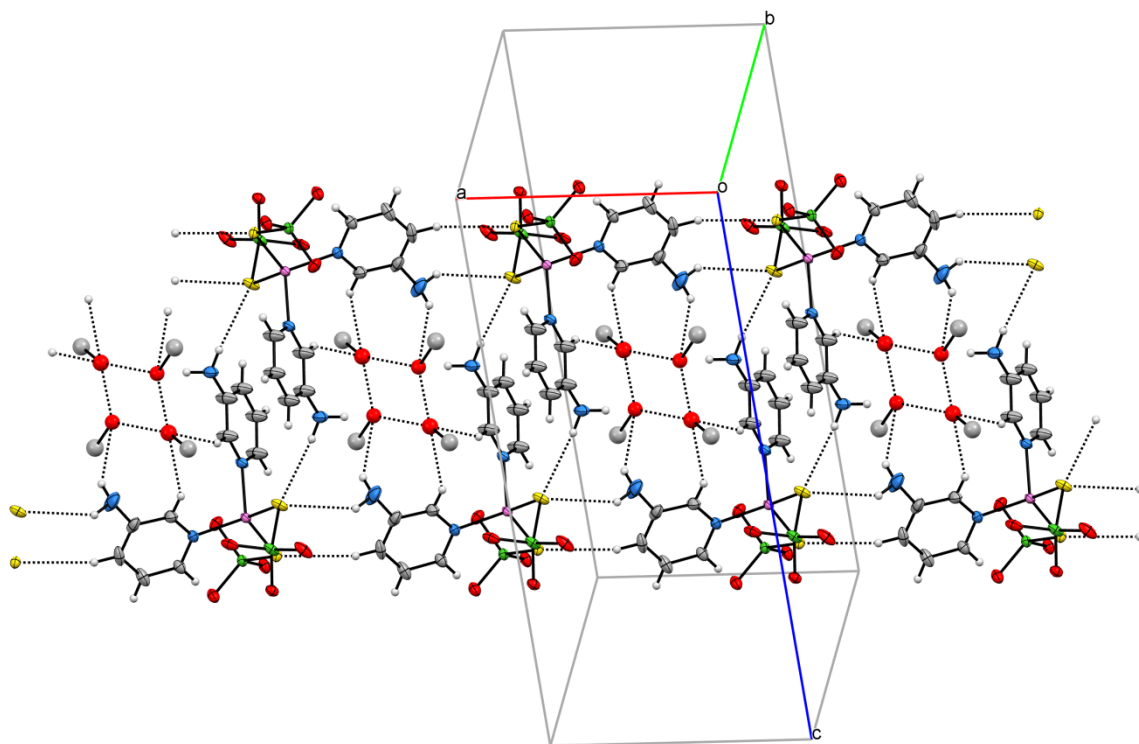

**Fig. S4** The view on the polymeric chain of compound **2** with hydrogen bonding interactions shown as dashed lines. *t*BuO groups omitted for clarity (S-yellow, O-red, N-blue, Si-green, Ni-celadon, C - grey).

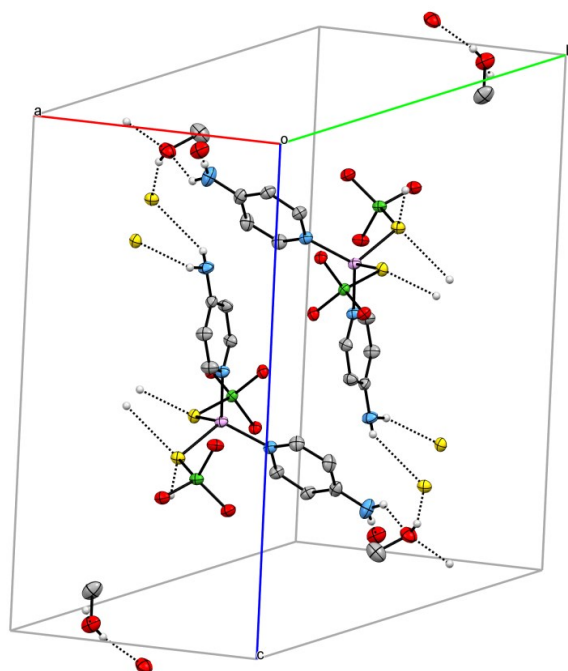

**Fig. S5** The net of hydrogen bonding interactions between molecules of compound **3** (S-yellow, O-red, N-blue, Si-green, Co-pink, C – grey, H-white).



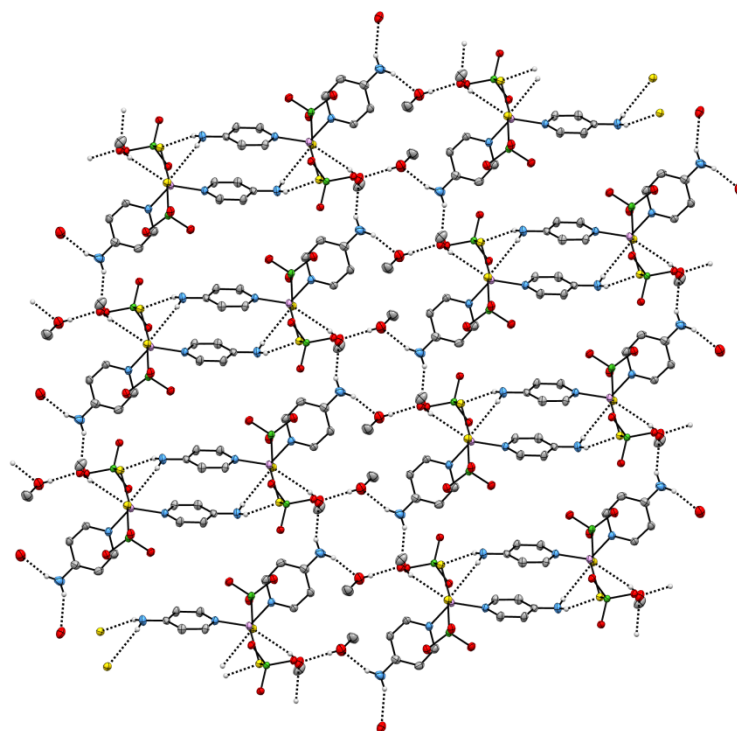

**Fig. S6** The crystal packing of **3** along *a* axis. with the hydrogen bonding interactions shown as dashed lines. tBu groups omitted for clarity (S-yellow, O-red, N-blue, Si-green, Co-pink, C - grey).

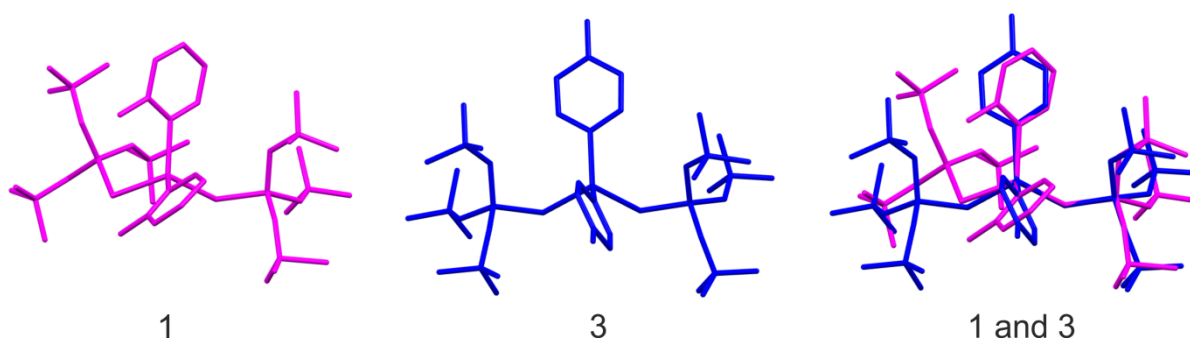

**Fig. S7** The overlay of X-ray molecular structures of complexes **1** and **3** generated by superimposing the coordination centers (Co, N, S atoms).

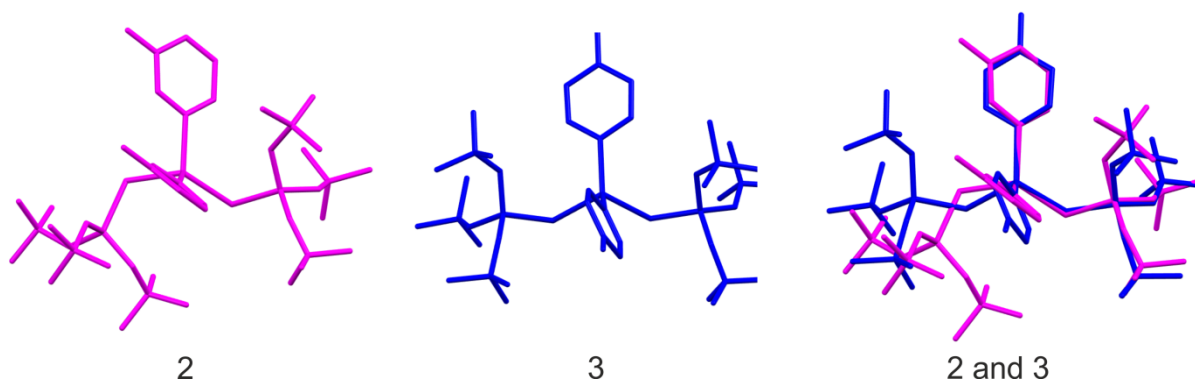

**Fig. S8** The overlay of X-ray molecular structures of complexes **2** and **3** generated by superimposing the coordination centers (Co, N, S atoms).

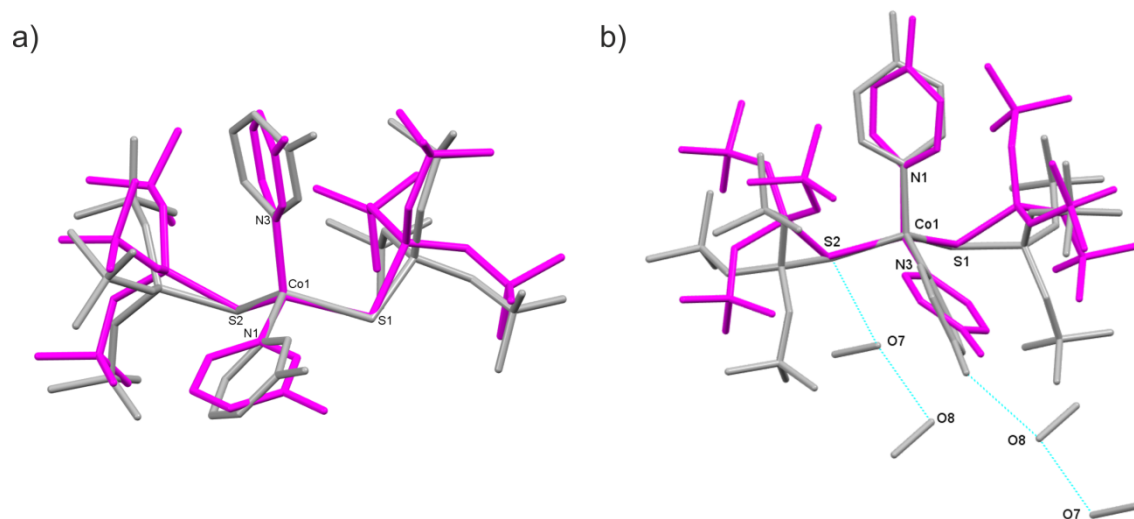

**Fig. S9** The overlays of calculated (magenta) and X-ray (grey) molecular structures of: a) complex **2** and b) complex **3**. Overlays were generated by superimposing the coordination centers (Co, N, S atoms).

Figure S9 a) and b) presents an overlay of calculated and experimental structures of complex **2** and complex **3**. The number of the unpaired electrons of the central cobalt(II) ion was correctly assigned as **3** since the overall geometry of the metal center did not change as a result of geometry optimization and remained tetrahedral. The observed rotation of the silyl substituents in **3** results obviously from the lack of intermolecular interactions – calculations were performed for vacuum and solvating molecules of methanol were removed from the structure of **3** before optimization procedure.

The shapes and energies of singly occupied HOMO and LUMO orbitals illustrated in Fig. S10 differ substantially for **2** and **3** which explains the differences between the absorption spectra of these compounds. Contrary to complexes **1** and **2** molecules of **3** exhibit approximate  $C_{2v}$  symmetry, which is reflected in the shape of its molecular orbitals as well as position and intensity of its absorption bands. Calculated UV-Vis spectra of **2** and **3** (including the first 300 excitations) are illustrated in Fig. S16.

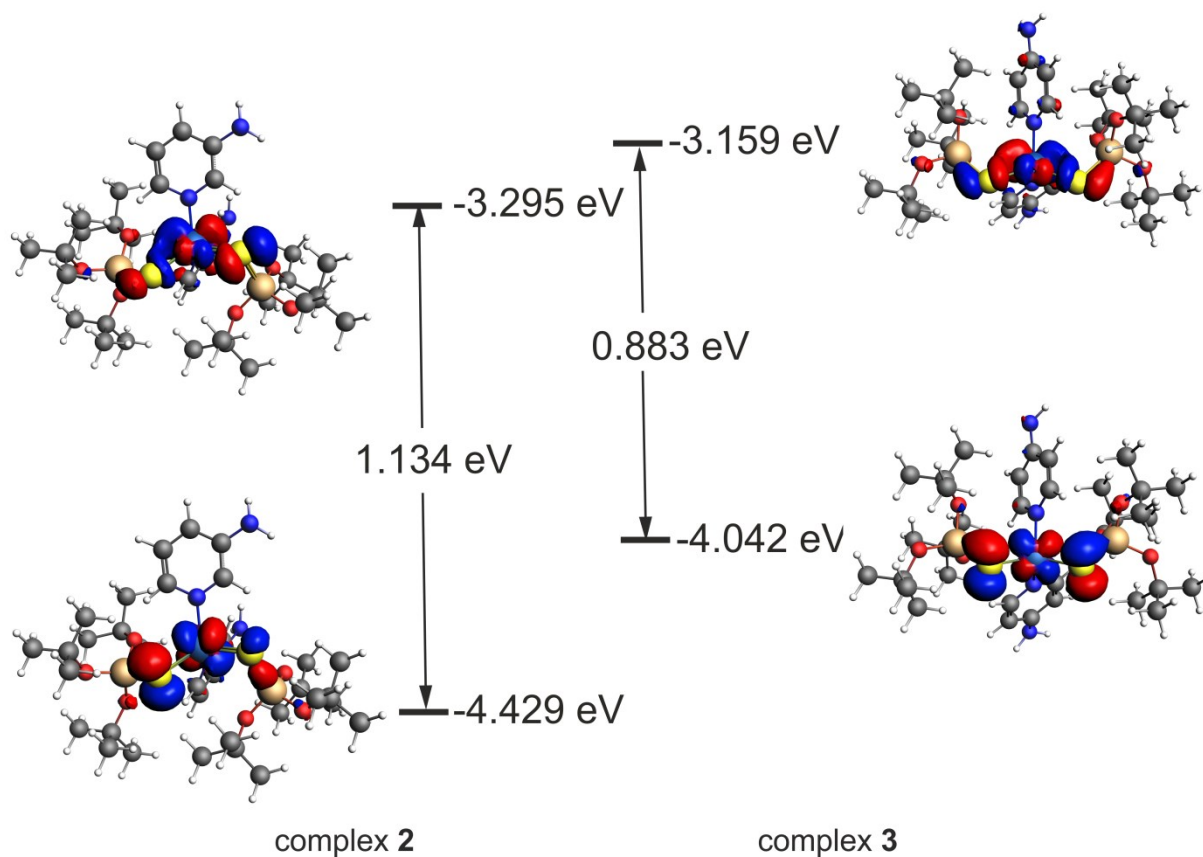

**Fig. S10** The illustration of energies and shapes of singly occupied HOMO and LUMO orbitals of complexes 2 and 3 calculated at BP86-D/TZP level.

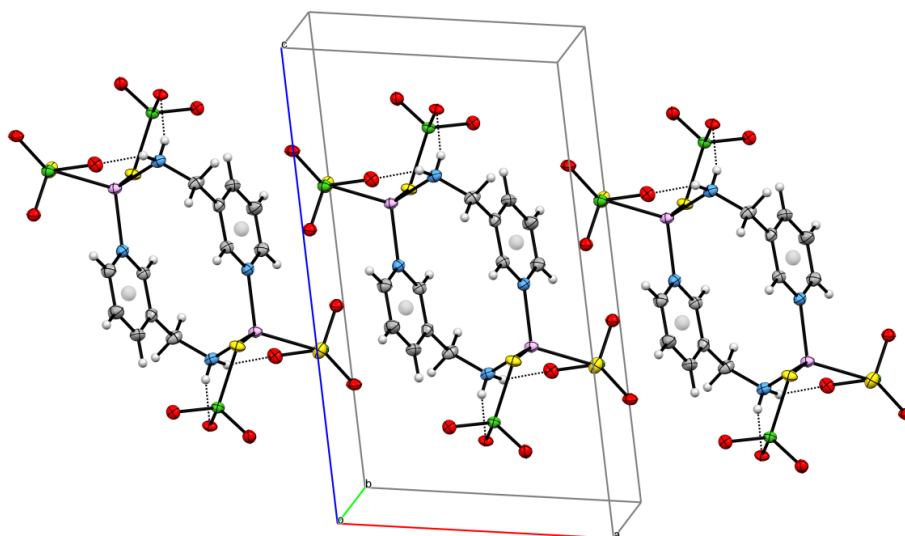

**Fig. S11** The crystal packing of 4 along *b* axis with the hydrogen bonding interactions shown as dashed lines. tBu groups omitted for clarity (S-yellow, O-red, N-blue, Si-green, Co-pink, C - grey).

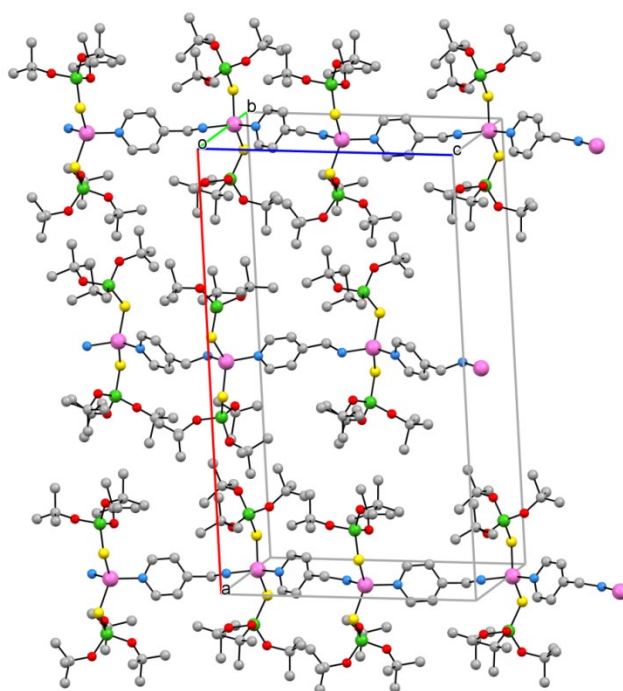

**Fig. S12** The crystal packing of **5** along *b* axis with the hydrogen bonding interactions shown as dashed lines. H atoms omitted for clarity (S-yellow, O-red, N-blue, Si-green, Co-pink, C - grey).

The FTIR spectrum of complex **1** shows the presence of sharp band located at  $3612\text{ cm}^{-1}$  which confirms the presence of water molecules in the structure of the compound. Although the most distinctive vibrational characteristic of  $\text{H}_2\text{O}$  molecule usually is the broad asymmetric spectrum about  $3400\text{ cm}^{-1}$ , but when the molecule is isolated in hydrophobic surrounding it exhibits the O–H vibrations as a sharp band located in the range of  $3700\text{--}3580\text{ cm}^{-1}$ . The similar trait was previously observed at  $3664\text{ cm}^{-1}$  in the FTIR spectrum of sodium aryloxysilanethiolate  $[\text{Na}\{\text{Si}(\text{Odipp})_3\}(\text{diglyme})(\text{H}_2\text{O})]$  as the vibrations of isolated water molecule [S. Godlewska, K. Baranowska, A. Dołęga, *Inorg. Chem. Commun.*, 2014, **40**, 69; A. Jabłońska, J. Bender, D. Gudat, Ł. Ponikiewski, A. Dołęga, *Polyhedron*, 2016, **115**, 219]. Therefore, the O–H stretch band in complex **1** is reasonably shifted towards lower energy as a result of its engagement in the formation of intermolecular  $\text{O}-\text{H}_{\text{water}}\cdots\text{S}_{\text{silanethiolate}}$  hydrogen bonding interactions.

The crystal structures of complexes **1-3** exhibit the presence of methanol molecules verified in the FTIR spectrum by the presence of the stretching vibrations of the O–H in the range of  $3480\text{--}3420\text{ cm}^{-1}$  which are also shifted due to their participation in the formation of hydrogen bonding interactions. The valence vibrations of amine N–H group are identified by the bands in the range of  $3325\text{--}3140\text{ cm}^{-1}$  and they are shifted due to their particular participation in the formation of diverse hydrogen bond interactions like intermolecular  $\text{N}-\text{H}\cdots\text{O}_{\text{water}}$  and  $\text{N}-\text{H}\cdots\text{O}_{\text{methanol}}$  in **1**,  $\text{N}-\text{H}\cdots\text{S}_{\text{silanethiolate}}$  in **2**, intermolecular  $\text{N}-\text{H}\cdots\text{O}_{\text{methanol}}$  and  $\text{N}-\text{H}\cdots\text{S}_{\text{silanethiolate}}$  in **3** and intramolecular interactions  $\text{N}-\text{H}\cdots\text{O}_{\text{silanethiolate}}$  in **4** and **5**.

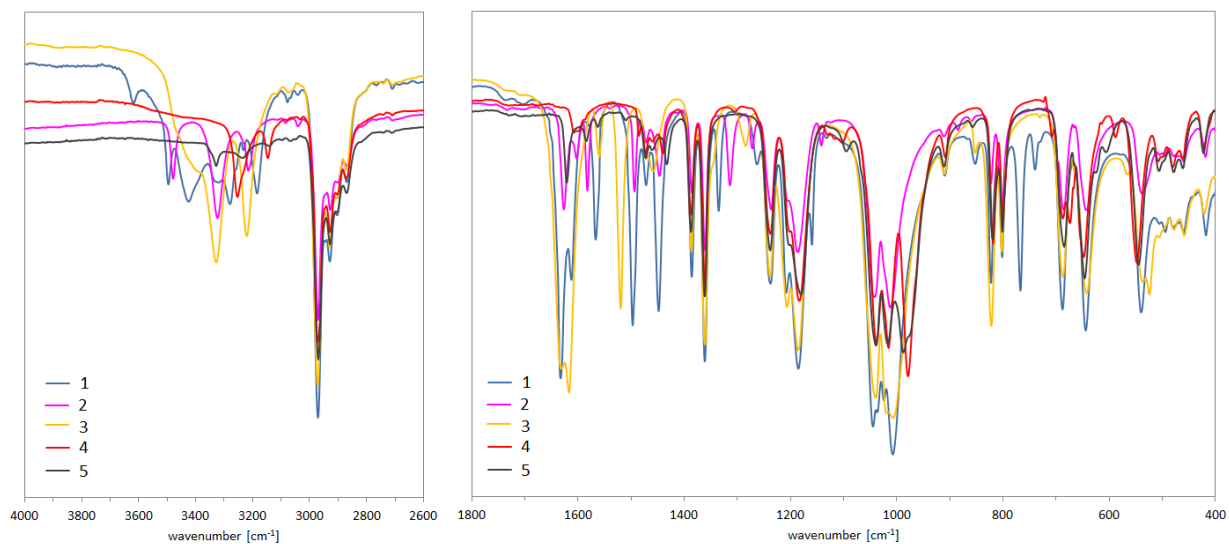

**Fig. S13** FTIR spectrum of complex **1-5** in the range of 4000-400  $\text{cm}^{-1}$

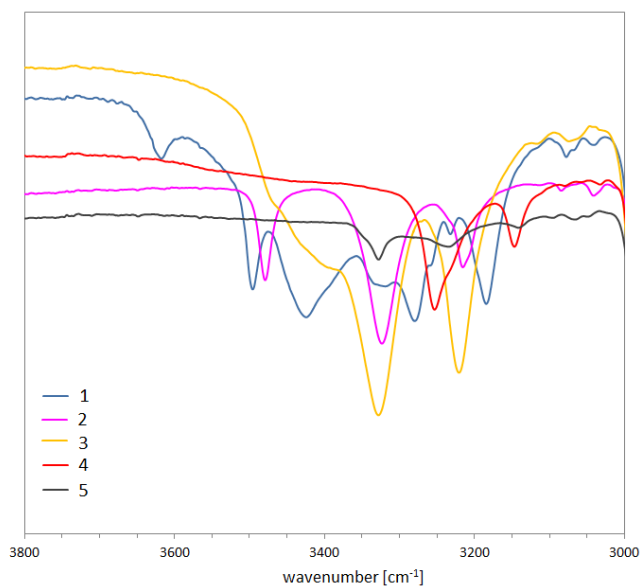

**Fig. S14** FTIR spectrum of complex **1-5** in the range of 4000-3000  $\text{cm}^{-1}$ .

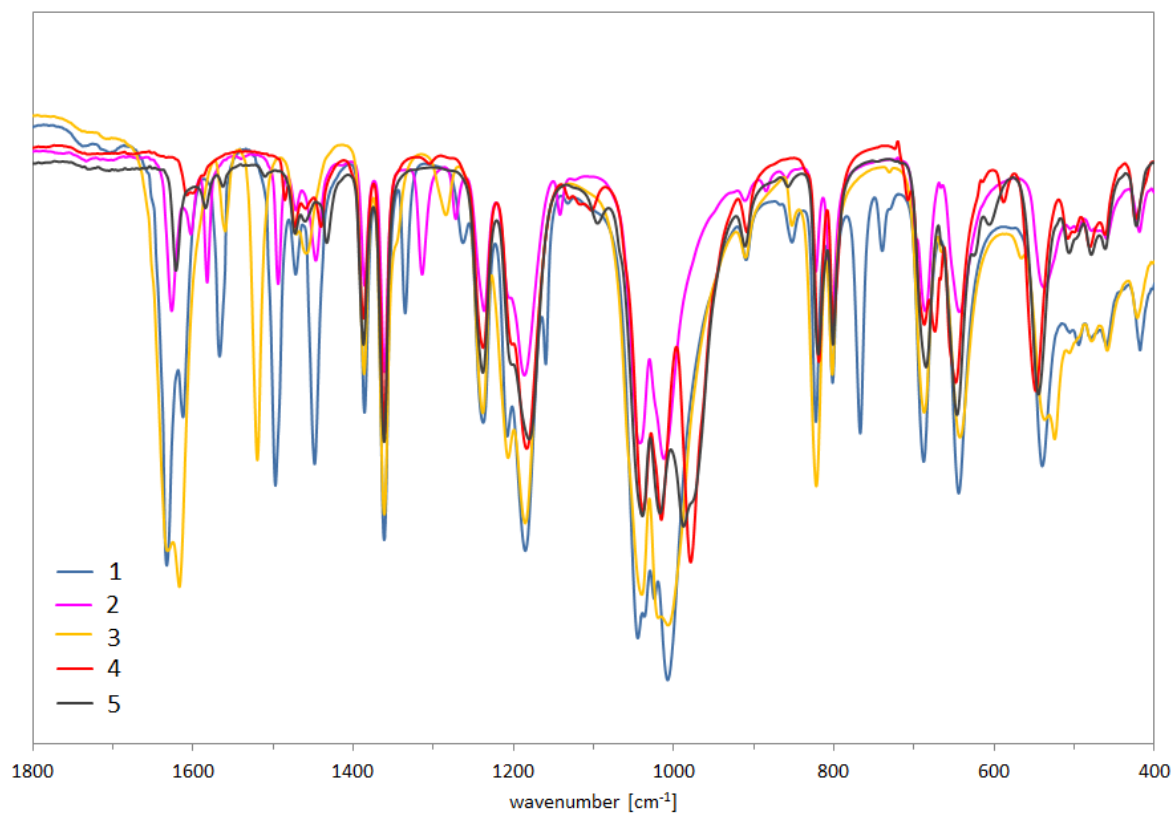

**Fig. S15** FTIR spectrum of complex **1-5** in the range of 1800-400  $\text{cm}^{-1}$ .

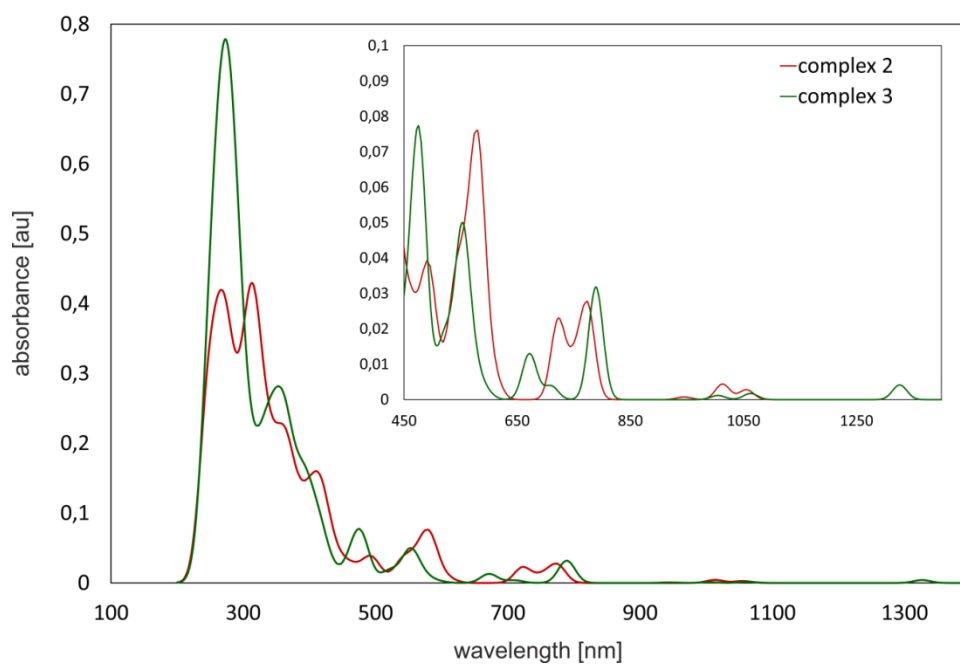

**Fig. S16** A comparison of TD-DFT UV-Vis spectra of **2** and **3**.

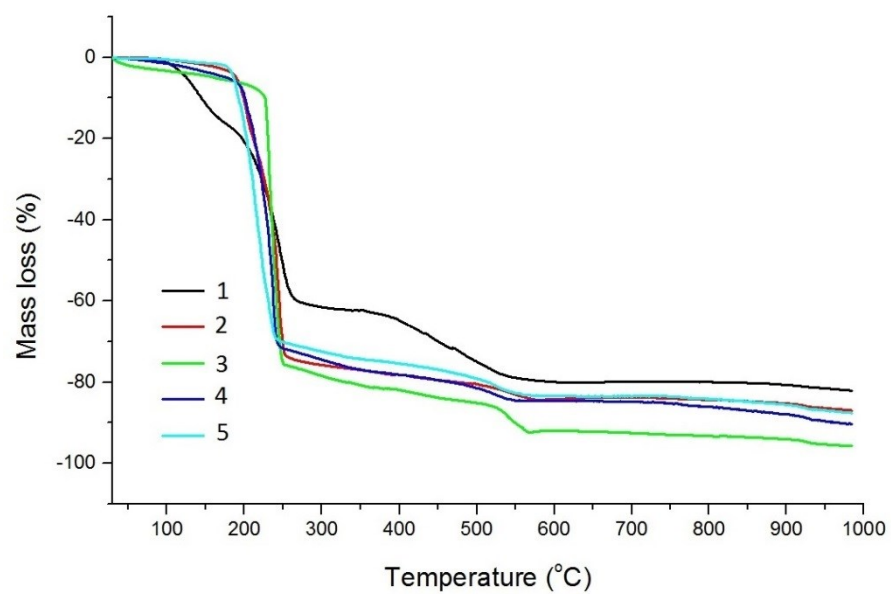

**Fig. S17** Thermal decomposition of complexes **1-5** in air.

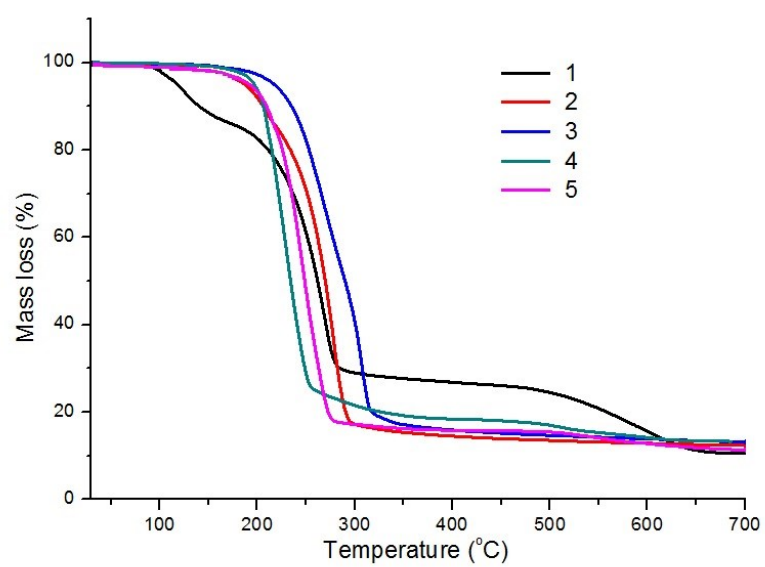

**Fig. S18** TG curves of complexes **1-5** recorded in nitrogen atmosphere.

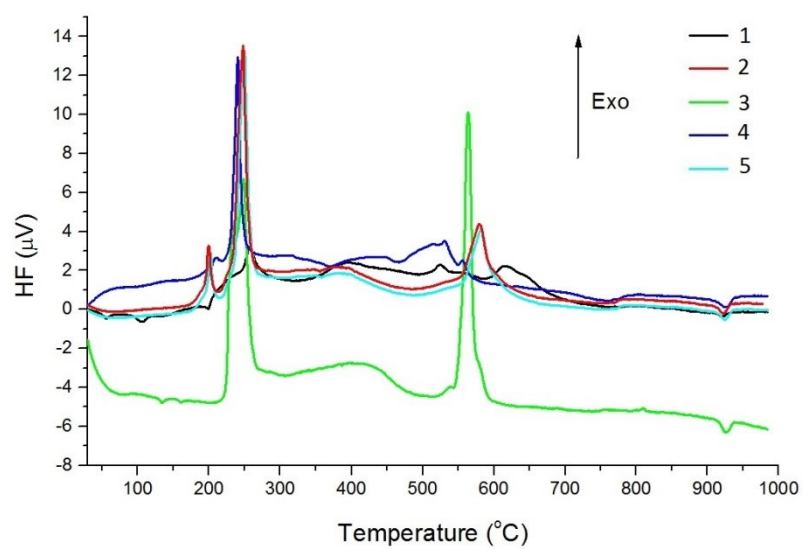

**Fig. S19** DSC curves of complexes **1-5** recorded in air atmosphere.

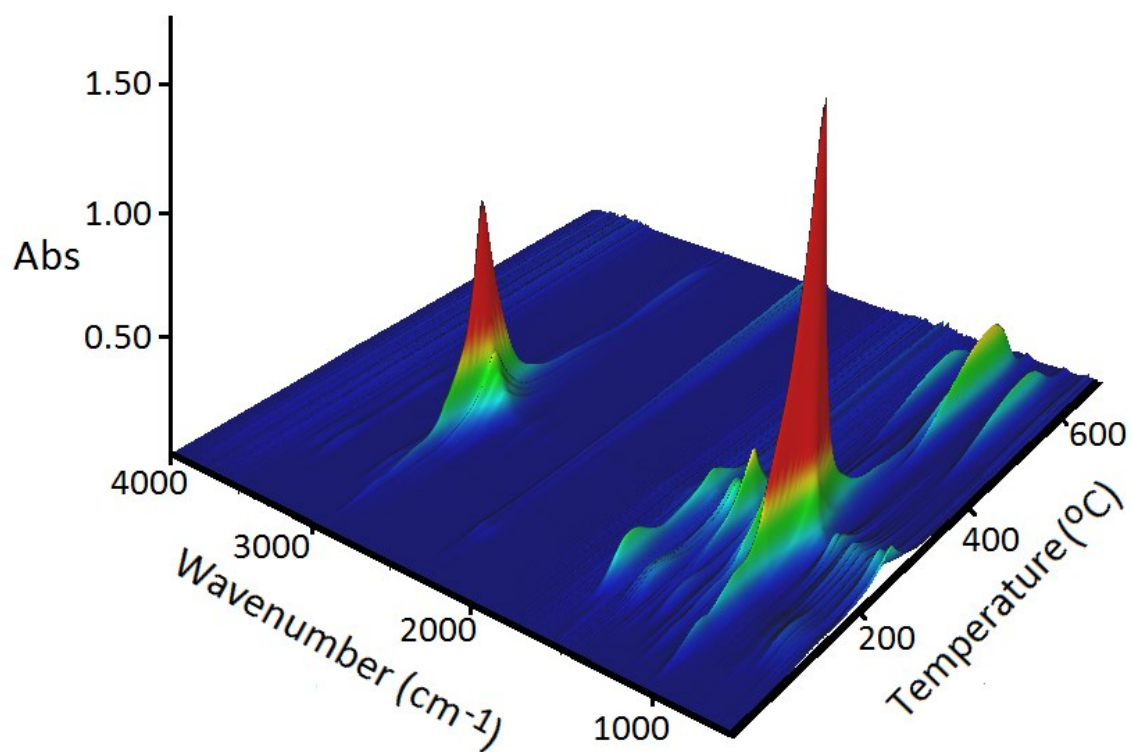

**Fig. S20** Stacked plot of the FTIR spectra of the evolved gases for complex **1**.



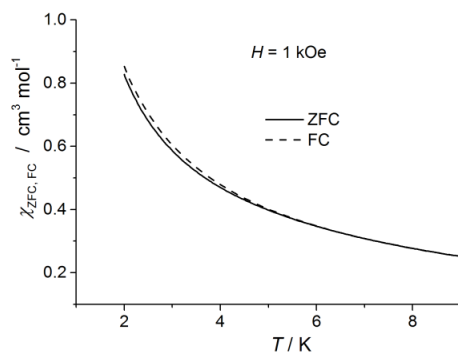

**Fig. S21** Temperature dependences of  $\chi_{ZFC}$  and  $\chi_{FC}$  molar magnetic susceptibilities of **2** measured under 1 kOe *dc* magnetic field.

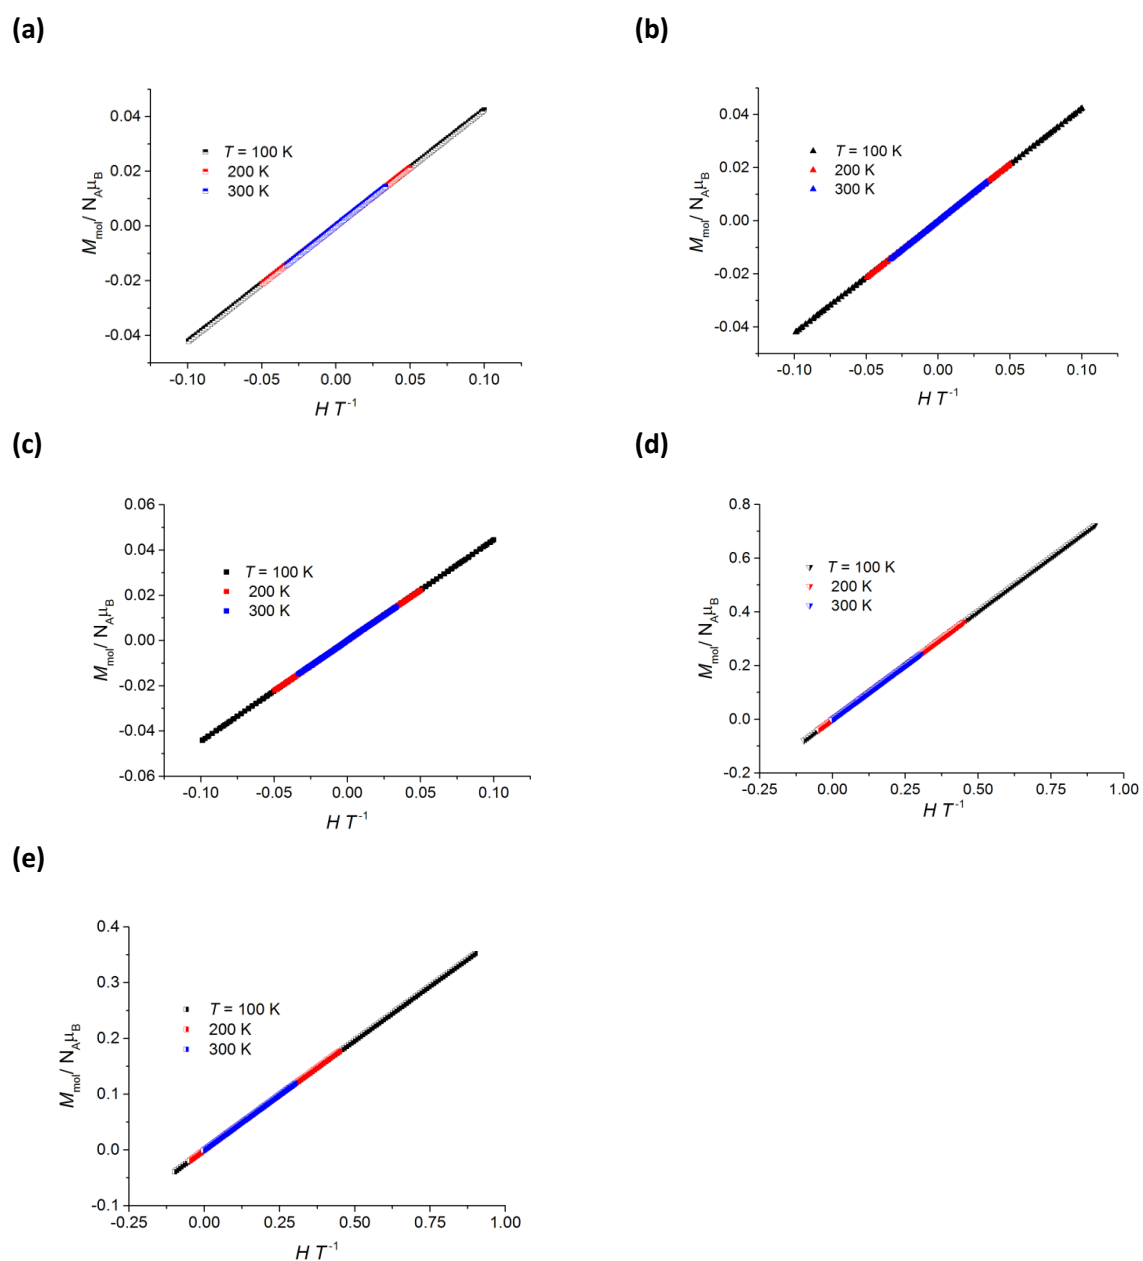

**Fig. S22** Magnetization curves in reduced coordinates  $M_{\text{mol}}/\mu_B N_A$  vs  $H/T$ , for **1** (a), **2** (b), **3** (c), **4** (d) and **5** (e), measured at 100, 200 and 298 K.

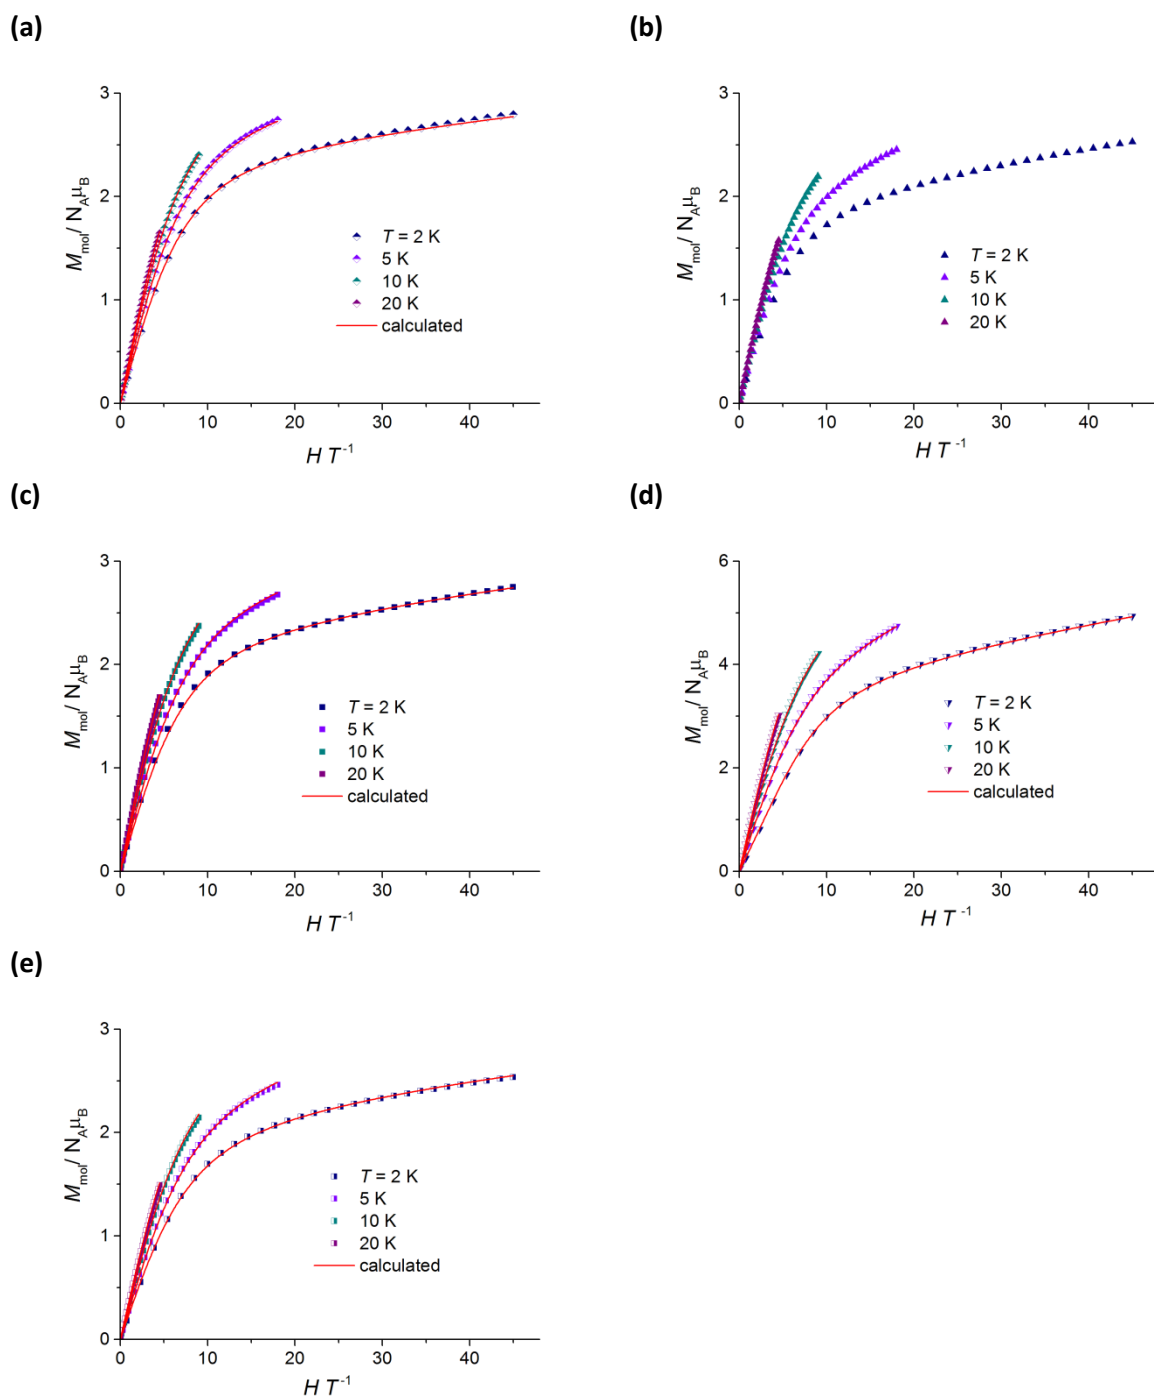

**Fig. S23** Magnetization curves in reduced coordinates  $M_{\text{mol}} / \mu_B N_A$  vs  $H/T$ , for **1** (a), **2** (b), **3** (c), **4** (d) and **5** (e), measured at 2, 5, 10 and 20 K (*symbols*). The solid red lines represent the best simulations of magnetic data for parameters presented in **Table 3** (see main text for details).

(a)

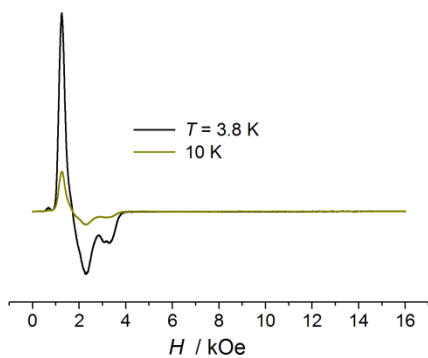

(b)

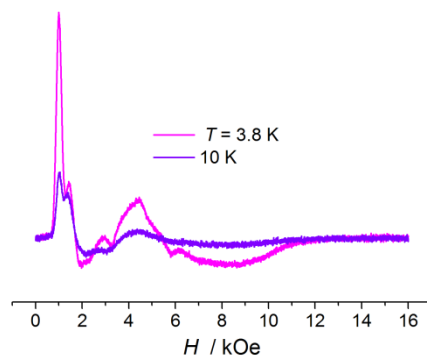

(c)

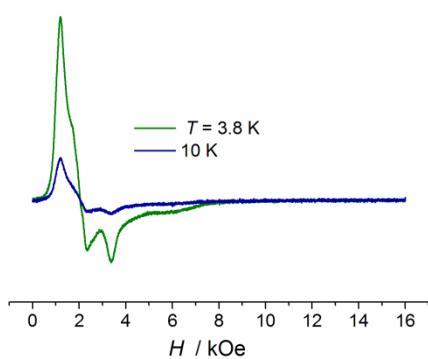

(d)

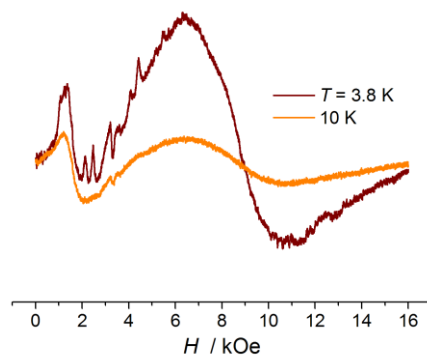

(e)

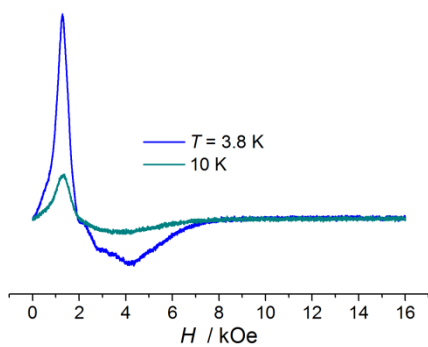

**Fig. S24** Experimental X-band EPR powder spectra of samples **1** (a), **2** (b), **3** (c), **4** (d) and **5** (e), recorded at 3.8 and 10 K.

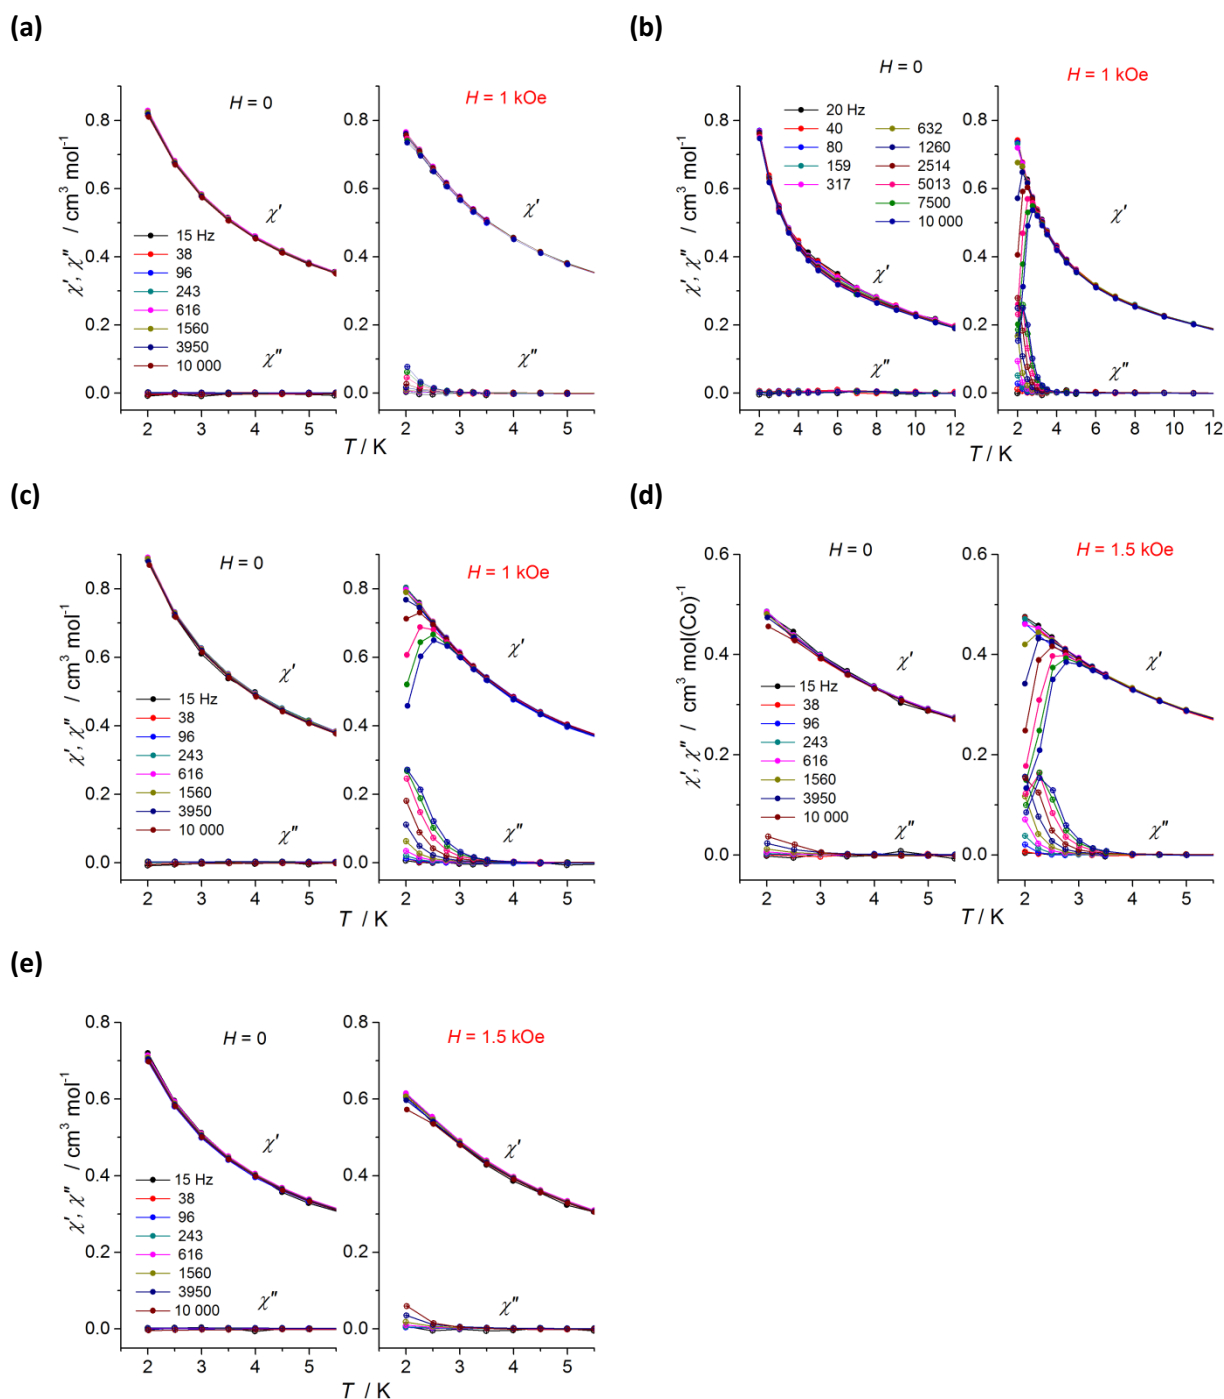

**Fig. S25** Temperature dependences of variable-frequency in-phase  $\chi'$  and out-of-phase  $\chi''$  ac susceptibility data, for **1** (a), **2** (b), **3** (c), **4** (d) and **5** (e) in the absence and presence of the static magnetic field (ac field frequencies selected from 15 Hz – 10 kHz range). For **4** the presented data are given per mole of Co(II) ions.

For **2**, the emergence of a slight  $\chi'$  dependence on frequency in the temperature range  $\sim 4 < T < 10$  K, without external magnetic field, may indicate weak inter-molecular FM coupling that was revealed by the *dc* variable-temperature measurements (see main text). In magnetic field,  $\chi'$  becomes

frequency-independent above  $\sim 4$  K, while below  $\sim 4$  K, the field-induced slow magnetization dynamic, occurs. This effect is also illustrated in Fig. S28 by  $\chi T$  vs  $T$  dependencies measured at  $H = 0$  kOe and  $H = 0.7$  kOe. Notable is that, for **2**, the low temperature values of molar in-phase  $ac$  susceptibility component  $\chi'$ , as well as  $\chi$  and  $M_{9T}$ , extracted from  $dc$  measurements, are comparable to their counterparts observed for other mononuclear compounds **1** and **3**. It suggests that in **2**, besides the main fraction of magnetically isolated Co(II) ions exhibiting field-induced slow magnetic relaxations, an admixture fraction of magnetically coupled cobalt centers exists. We suppose that the formation of such fraction of magnetically coupled cobalt ions in **2** may be induced by the loss of methanol solvent molecules - lack of solvent molecules, e.g. in the surface layers of crystallites, can lead to some disorders in crystal packing allowing inter-molecular magnetic interactions. To check if the loss of incorporated solvent molecules occurs when the sample is exposed to a vacuum in the PPMS, the measurements of the powdered **2** immersed in eicosane (melting point 310 K) have been also performed. No significant difference in magnetic results for samples **2** with and without eicosane was observed. This indicates that such loss of methanol solvent molecules would rather happened during the powdering process required to be done before magnetic measurements.

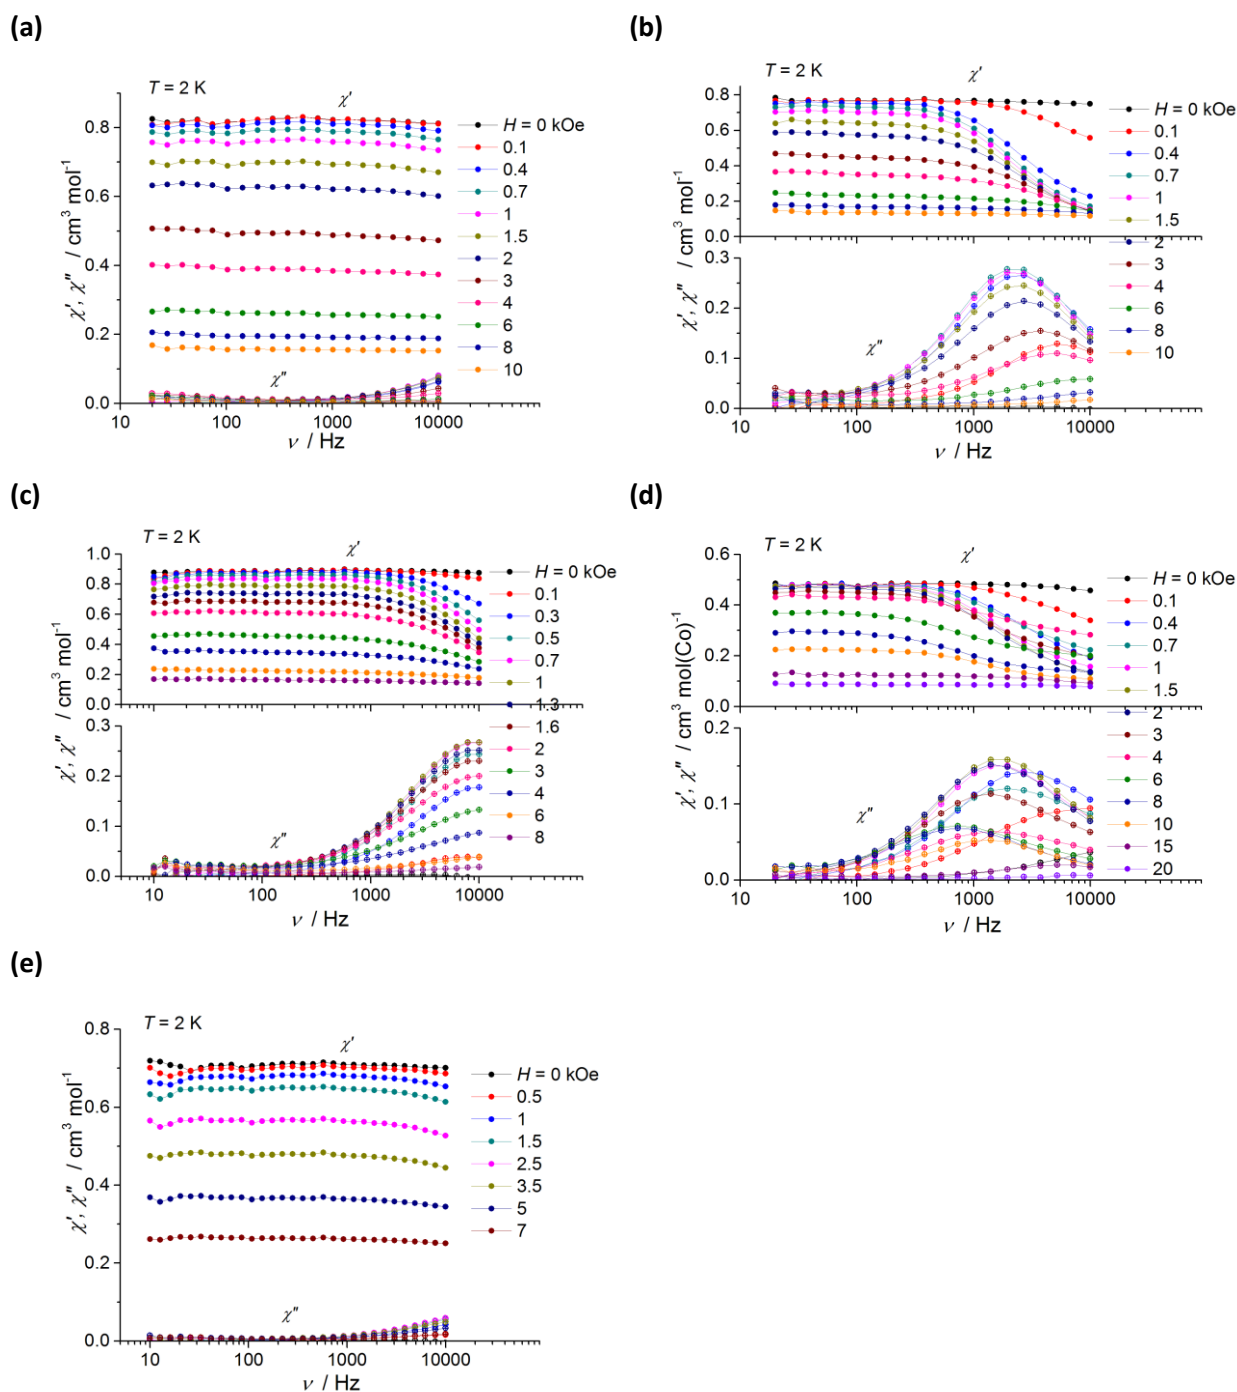

**Fig. S26** Frequency-dependent in-phase  $\chi'$  and out-of-phase  $\chi''$  ac susceptibility data, for **1** (a), **2** (b), **3** (c), **4** (d) and **5** (e), measured under different  $dc$  magnetic field, at 2 K (lines are guide to the eye). For **4** the presented data are given per mole of Co(II) ions.

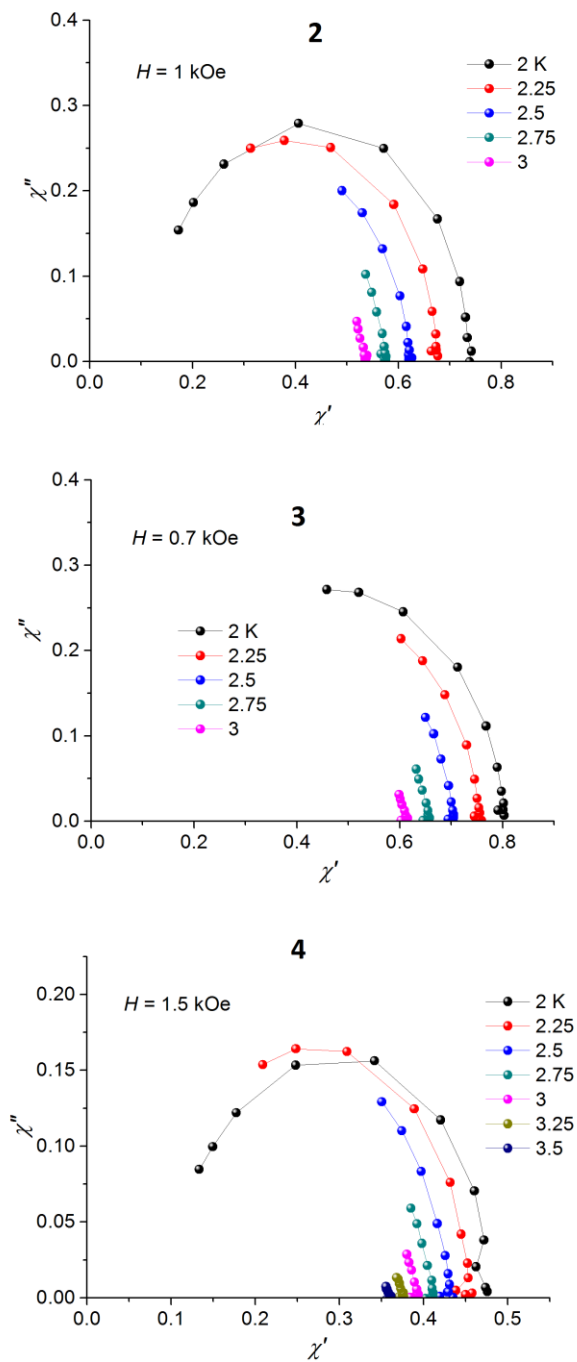

**Fig. S27** Cole-Cole plots for **2** (upper), **3** (middle) and **4** (bottom) under optimum *dc* magnetic field, from 2 to 3.5 K (lines are guide to the eye). For **4** the presented data are given per mole of Co(II) ions.

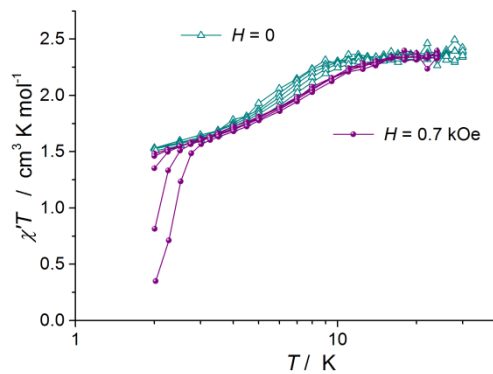

**Fig. S28** Temperature dependences of variable-frequency *ac* susceptibility data  $\chi''T$ , for **2**, in the absence and presence of the static magnetic field.

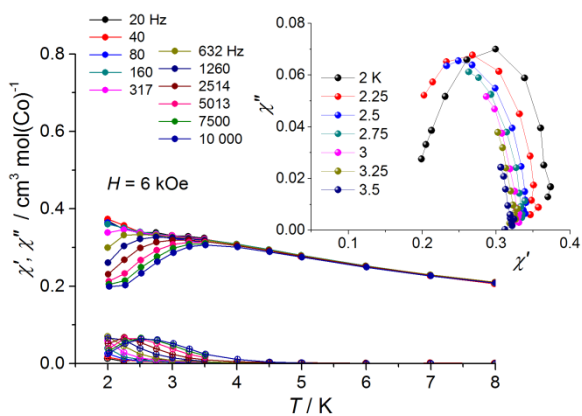

**Fig. S29** Temperature dependences of variable-frequency *ac* susceptibility data,  $\chi'$  and  $\chi''$ , for **4** measured under 6 kOe *dc* field. Inset: Cole-Cole plot for **4** under 6 kOe *dc* field, from 2 to 3.5 K (lines are guide to the eye). Data are given per mole of Co(II) ions.



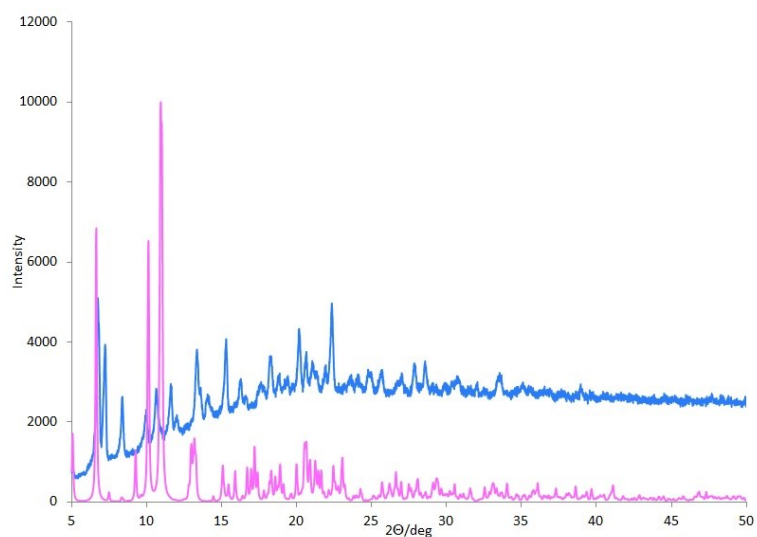

**Fig. S30** The powder X-ray pattern of complex **1**: measured – blue line; the simulated pattern derived from single crystal data – pink line.

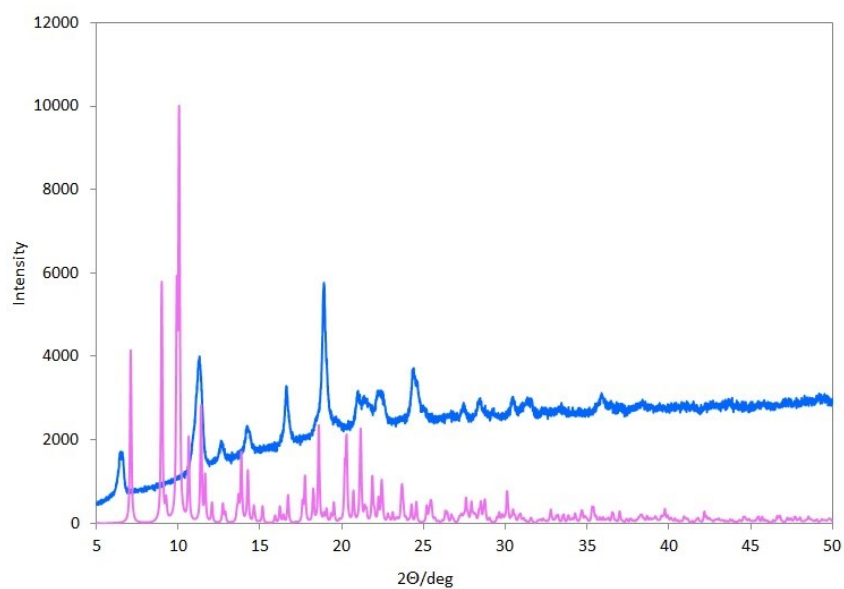

**Fig. 31** The powder X-ray pattern of complex **2**: measured – blue line; the simulated pattern derived from single crystal data – pink line.

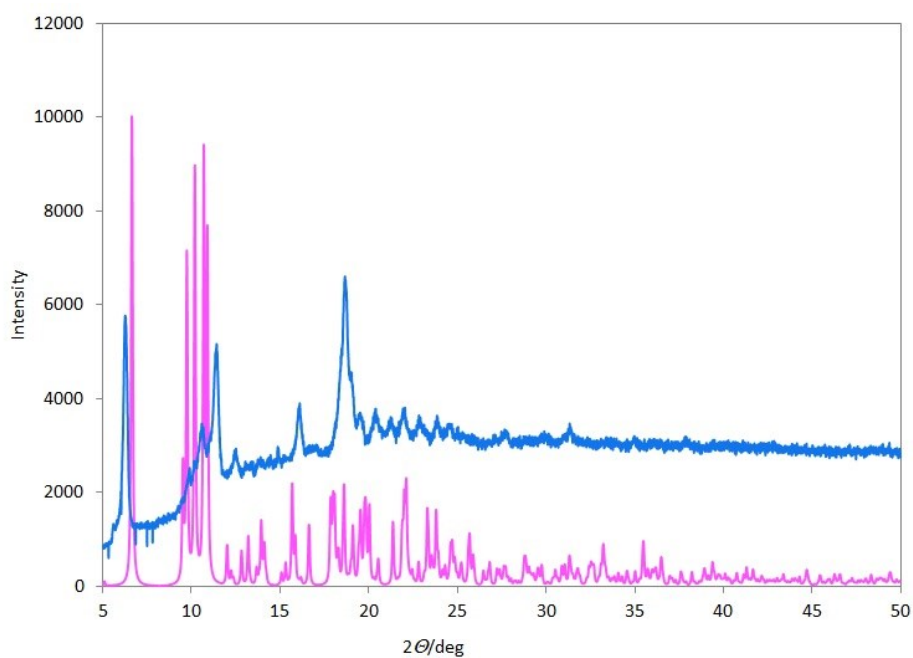

**Fig. S32** The powder X-ray pattern of complex **3**: measured – blue line; the simulated pattern derived from single crystal data – pink line.

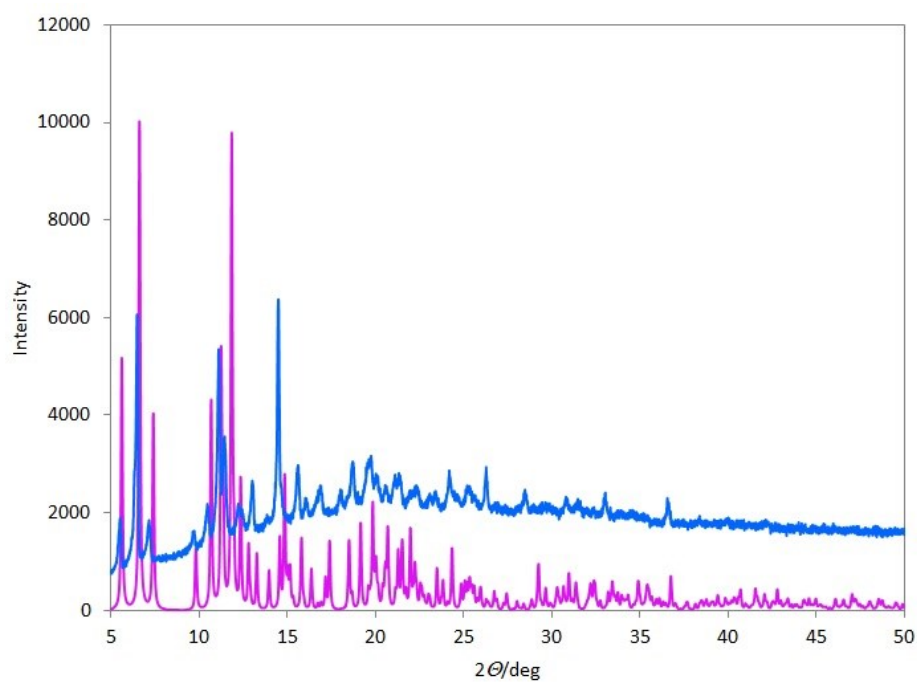

**Fig. S33** The powder X-ray pattern of complex **4**: measured – blue line; the simulated pattern derived from single crystal data – pink line.

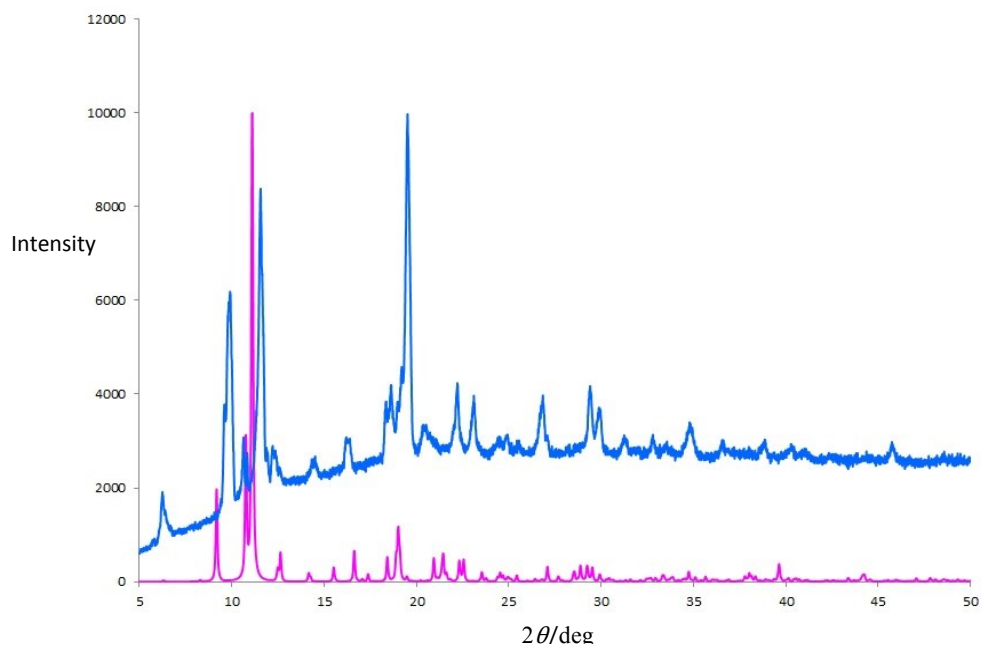

**Fig. S34** The powder X-ray pattern of complex **5**: measured – blue line; the simulated pattern derived from single crystal data – pink line.
